# Supplementary material for: Synthesis, biological evaluation, substitution behaviour and DFT study of Pd(ii) complexes incorporating benzimidazole derivative
Source: Royal Society of Chemistry journal article supplement (doi:10.1039/c7nj05173e), 2018-01-01
Supplement: c7nj05173e1.pdf [file c7nj05173e1.pdf]

## Electronic Supplementary Information

### Synthesis, biological evaluation, substitution behaviour and DFT study of Pd(II) complexes incorporating benzimidazole derivative

Ishani Mitra<sup>a</sup>, Subhajit Mukherjee<sup>a</sup>, Venkata P. Reddy B.<sup>a</sup>, Bashkim Misini<sup>b</sup>, Payel Das<sup>c</sup>, Subrata Dasgupta<sup>a</sup>, Wolfgang Linert<sup>b</sup> and Sankar Ch. Moi<sup>\*a</sup>

a. Department of Chemistry, National Institute of Technology, Durgapur-713209, W.B. India

b. Institute of Applied Synthetic Chemistry, Vienna University of Technology, Getreidemarkt, 9/163-AC, 1060 Vienna, Austria

c. Department of Biotechnology, National Institute of Technology, Durgapur-713209, W.B. India

#### Table of contents

|    |               |                                                                                                                                                                                                                                                                                                                                      |
|----|---------------|--------------------------------------------------------------------------------------------------------------------------------------------------------------------------------------------------------------------------------------------------------------------------------------------------------------------------------------|
| 1  | SUP. Fig. S1  | IR spectra of <b>C1</b> in KBr disk.                                                                                                                                                                                                                                                                                                 |
| 2  | SUP. Fig. S2  | <sup>1</sup> H NMR spectra of <b>C1</b> in DMSO-D <sub>6</sub> .                                                                                                                                                                                                                                                                     |
| 3  | SUP. Fig. S3  | ESI mass spectra of <b>C1</b> in DMSO.                                                                                                                                                                                                                                                                                               |
| 4  | SUP. Fig. S4  | IR spectra of <b>C2</b> in KBr disk.                                                                                                                                                                                                                                                                                                 |
| 5  | SUP. Fig. S5  | <sup>1</sup> H NMR spectra of <b>C2</b> in DMSO-D <sub>6</sub> .                                                                                                                                                                                                                                                                     |
| 6  | SUP. Fig. S6  | IR spectra of <b>C3</b> in KBr disk.                                                                                                                                                                                                                                                                                                 |
| 7  | SUP. Fig. S7  | <sup>1</sup> H NMR spectra of <b>C3</b> in D <sub>2</sub> O.                                                                                                                                                                                                                                                                         |
| 8  | SUP. Fig. S8  | ESI mass spectra of <b>C3</b> in water.                                                                                                                                                                                                                                                                                              |
| 9  | SUP. Fig. S9  | IR spectra of <b>C4</b> in KBr disk.                                                                                                                                                                                                                                                                                                 |
| 10 | SUP. Fig. S10 | <sup>1</sup> H NMR spectra of <b>C4</b> in DMSO-D <sub>6</sub> .                                                                                                                                                                                                                                                                     |
| 11 | SUP. Fig. S11 | ESI mass spectra of <b>C4</b> in water.                                                                                                                                                                                                                                                                                              |
| 12 | SUP. Fig. S12 | IR spectra of <b>C5</b> in KBr disk.                                                                                                                                                                                                                                                                                                 |
| 13 | SUP. Fig. S13 | <sup>1</sup> H NMR spectra of <b>C5</b> in DMSO-D <sub>6</sub> .                                                                                                                                                                                                                                                                     |
| 14 | SUP. Fig. S14 | ESI mass spectra of <b>C5</b> in water.                                                                                                                                                                                                                                                                                              |
| 15 | SUP. Fig. S15 | IR spectra of <b>C6</b> in KBr disk.                                                                                                                                                                                                                                                                                                 |
| 16 | SUP. Fig. S16 | <sup>1</sup> H NMR spectra of <b>C6</b> in D <sub>2</sub> O.                                                                                                                                                                                                                                                                         |
| 17 | SUP. Fig. S17 | ESI mass spectra of <b>C6</b> in water.                                                                                                                                                                                                                                                                                              |
| 18 | SUP. Fig. S18 | pH vs. volume (ml) of 0.025 M KOH solution (HP1 and HP2 correspond to pKa1 and pKa2 respectively).                                                                                                                                                                                                                                   |
| 19 | SUP. Fig. S19 | Job's plot for the formation of complexes <b>C3-C6</b> at pH 4.0.                                                                                                                                                                                                                                                                    |
| 20 | SUP. Fig. S20 | Scan overlay at 2-min interval of the reaction of <b>C2</b> with NALC and GSH. [ <b>C2</b> ] = 4.71 × 10 <sup>-4</sup> M, [NALC/GSH] = 4.71 × 10 <sup>-3</sup> M, pH = 4.0, 25 °C.                                                                                                                                                   |
| 21 | SUP. Fig. S21 | Typical absorbance-time trace for the reaction of <b>C2</b> with L-cys fitted with two exponential functions. The top of the figure shows the absorbance difference between measured and calculated kinetic traces. [ <b>C2</b> ] = 4.71 × 10 <sup>-4</sup> M; [L-cys] = 4.71 × 10 <sup>-3</sup> M; pH = 4.0, λ = 250 nm; T = 25 °C. |
| 22 | SUP. Fig. S22 | Plot of 10 <sup>-4</sup> × k <sub>1(obs)</sub> versus 10 <sup>3</sup> × [Nu] at different temperatures.                                                                                                                                                                                                                              |
| 23 | SUP. Fig. S23 | Plot of 1/ k <sub>1(obs)</sub> versus 1/ [Nu] at different temperatures.                                                                                                                                                                                                                                                             |
| 24 | SUP. Fig. S24 | Eyring plots (ln k <sub>1</sub> h/k <sub>B</sub> T vs 10 <sup>3</sup> × 1/T and ln k <sub>2</sub> h/k <sub>B</sub> T vs 10 <sup>3</sup> × 1/T ) for the reaction of <b>C2</b> with L-cys, NALC, DL-pen and GSH.                                                                                                                      |
| 25 | SUP. Fig. S25 | Experimental (in pink) and simulated (in black) UV-Vis spectrum of the Pd(II) complexes <b>C3-C6</b> in CPCM/water (Simulation done at TDDFT/B3LYP/6-31G(d)/6-31G+(d)/LANL2DZ level of theory).                                                                                                                                      |
| 26 | SUP. Fig. S26 | UV spectra of 20 μM of (A) <b>C3</b> (B) <b>C4</b> (C) <b>C5</b> and (D) <b>C6</b> in Tris-HCl buffer in                                                                                                                                                                                                                             |

|    |                  |                                                                                                                                                                                                                                                                                                                                                      |
|----|------------------|------------------------------------------------------------------------------------------------------------------------------------------------------------------------------------------------------------------------------------------------------------------------------------------------------------------------------------------------------|
|    |                  | the presence of increasing amounts of CT-DNA (0–200 $\mu\text{M}$ ). The arrow indicates the changes in the absorbance on addition of DNA. Inset: linear fit of $[\text{DNA}]/(\epsilon_a - \epsilon_f)$ vs. $[\text{DNA}]$ .                                                                                                                        |
| 27 | SUP. Fig. S27    | Emission spectra for EB–DNA ( $[\text{EB}] = 20 \mu\text{M}$ , $[\text{DNA}] = 20 \mu\text{M}$ ) in the absence and presence of increasing amounts of (A) <b>C3</b> (B) <b>C4</b> (C) <b>C5</b> and (D) <b>C6</b> . The arrow shows the changes of intensity upon increasing amount of complexes. Inset: Plot of $I_0/I$ versus $[\text{complex}]$ . |
| 28 | SUP. Fig. S28    | Scatchard plot for DNA binding of complexes <b>C1–C6</b> .                                                                                                                                                                                                                                                                                           |
| 29 | SUP. Fig. S29    | Effect of increasing amounts of EB and studied Pd(II) complexes on the relative viscosity of CT-DNA at 25°C.                                                                                                                                                                                                                                         |
| 30 | SUP. Fig. S30    | Computational docking models illustrating the interactions of (A) <b>C3</b> , (B) <b>C4</b> , (C) <b>C5</b> with 1DNE and of (D) <b>C6</b> with 1DSC.                                                                                                                                                                                                |
| 31 | SUP. Fig. S31    | Magnified view of the docked models showing the interaction of complexes <b>C1–C6</b> with DNA base pairs.                                                                                                                                                                                                                                           |
| 32 | SUP. Fig. S32    | Absorption spectra of BSA (10 $\mu\text{M}$ ) in Tris-HCl buffer in presence of the complexes <b>C1–C6</b> (5 $\mu\text{M}$ ).                                                                                                                                                                                                                       |
| 33 | SUP. Fig. S33    | Emission spectra of BSA (1.0 $\mu\text{M}$ ) in Tris-HCl buffer (pH 7.0) at 298 K in presence of (A) <b>C1</b> , (B) <b>C3</b> and (C) <b>C4</b> (5–60 $\mu\text{M}$ ). The arrow shows the emission intensity changes upon increasing complex concentration. Insets: Stern-Volmer plot showing tryptophan quenching in BSA.                         |
| 34 | SUP. Fig. S34    | Scatchard plot for BSA binding of complexes <b>C1–C6</b> .                                                                                                                                                                                                                                                                                           |
| 35 | SUP. Fig. S35    | Growth Inhibition (%) of MDA-MB-231, A549, and HepG2 cell lines in presence of complex <b>C1–C6</b> and Cisplatin (5–50 $\mu\text{M}$ ).                                                                                                                                                                                                             |
| 36 | SUP. Table S1    | $10^{-3} \times k_{1(\text{obs})}$ ( $\text{s}^{-1}$ ) and $k_{2(\text{obs})}$ ( $\text{s}^{-1}$ ) values at different $[\text{ligand}]$ at different temperatures; $[\text{C2}] = 4.71 \times 10^{-4} \text{ M}$ , pH = 4.0, ionic strength = 0.1 M $\text{NaClO}_4$ (Herein “ $\pm$ values” represent standard error values)                       |
| 37 | SUP. Table S2    | Energy and composition of some selected MOs of <b>C3–C6</b> .                                                                                                                                                                                                                                                                                        |
| 38 | SUP. Table S3    | Occupancy ( $e$ ) and polarity (%) of natural bond orbitals (NBOs) and hybrids calculated for complex <b>C4–C6</b> .                                                                                                                                                                                                                                 |
| 39 | SUP. Table S4    | Selected vertical excitations calculated by TDDFT/B3LYP/6-31G(d)/6-31G+(d)/LANL2DZ /CPCM/water for <b>C3–C6</b> .                                                                                                                                                                                                                                    |
| 40 | SUP. Table S5    | Band shift (nm) and free energy ( $\text{kJ mol}^{-1}$ ) of DNA binding by absorption titration.                                                                                                                                                                                                                                                     |
| 41 | SUP. Table S6    | Hydrogen bonding interactions and the binding free energy of the most stable docking conformations for complexes <b>C1–C6</b> docked into DNA.                                                                                                                                                                                                       |
| 42 | SUP. Table S7    | $\text{IC}_{50}$ values (in $\mu\text{M}$ ) of the complexes <b>C1–C6</b> and cisplatin on different cancer cell lines for 48 hrs incubation.                                                                                                                                                                                                        |
| 43 | SUP. Equation S1 | Wolfe-Shimer equation                                                                                                                                                                                                                                                                                                                                |
| 44 | SUP. Equation S2 | Free energy of binding                                                                                                                                                                                                                                                                                                                               |
| 45 | SUP. Equation S3 | Stern–Volmer equation                                                                                                                                                                                                                                                                                                                                |
| 46 | SUP. Equation S4 | Scatchard equation                                                                                                                                                                                                                                                                                                                                   |

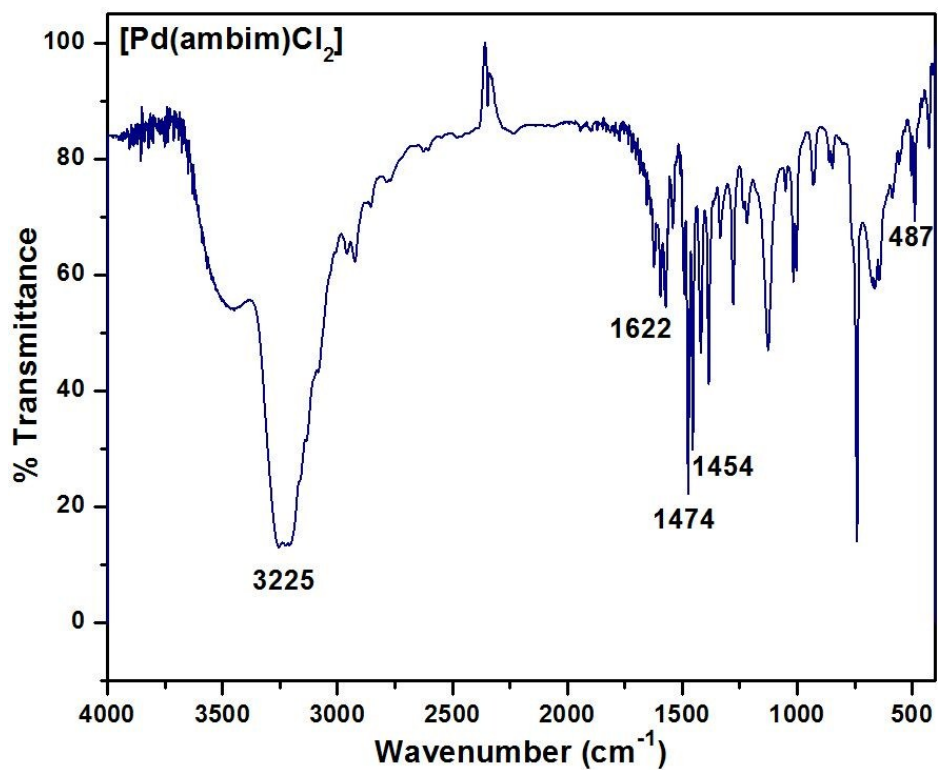

Sup. Fig. S1 IR spectrum of **C1**

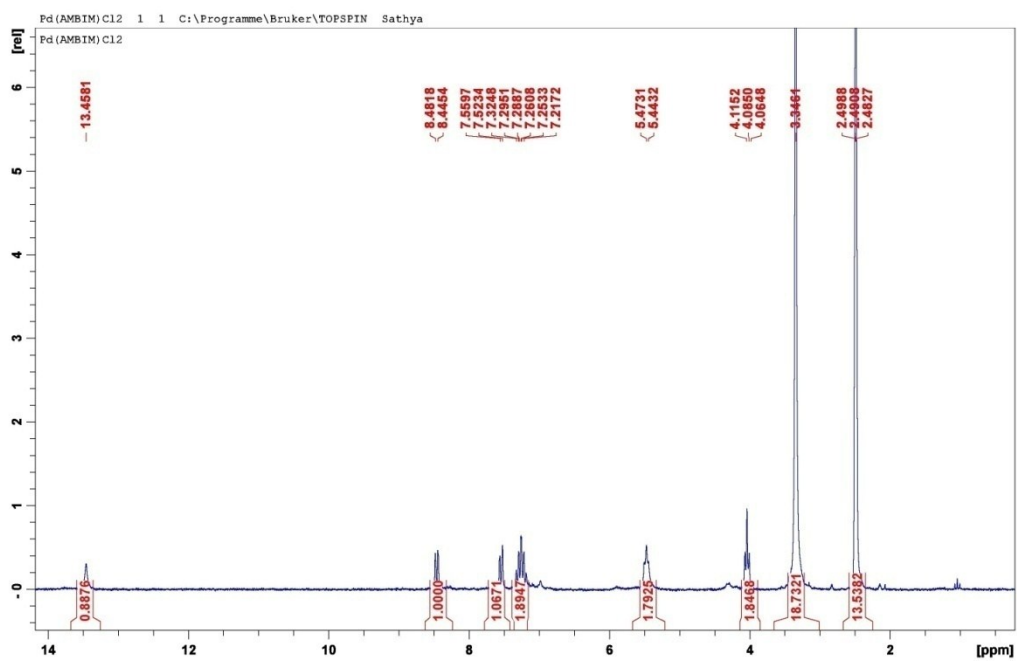

Sup. Fig. S2 <sup>1</sup>H NMR spectrum of **C1** in DMSO-D<sub>6</sub>

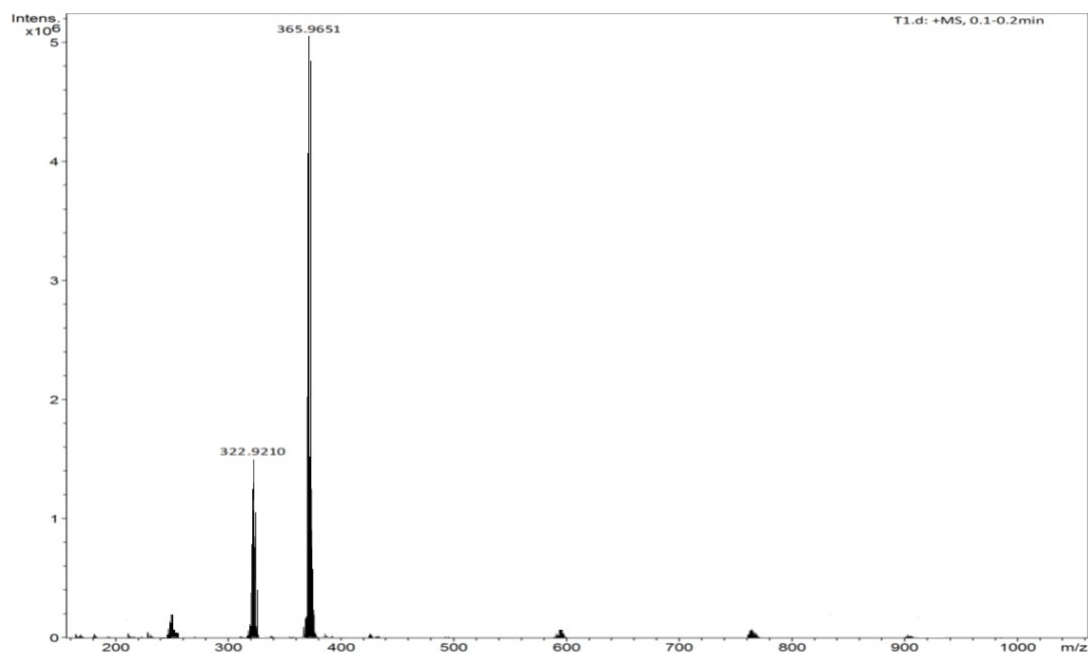

Sup. Fig. S3 ESI-Mass spectrum of **C1** in DMSO

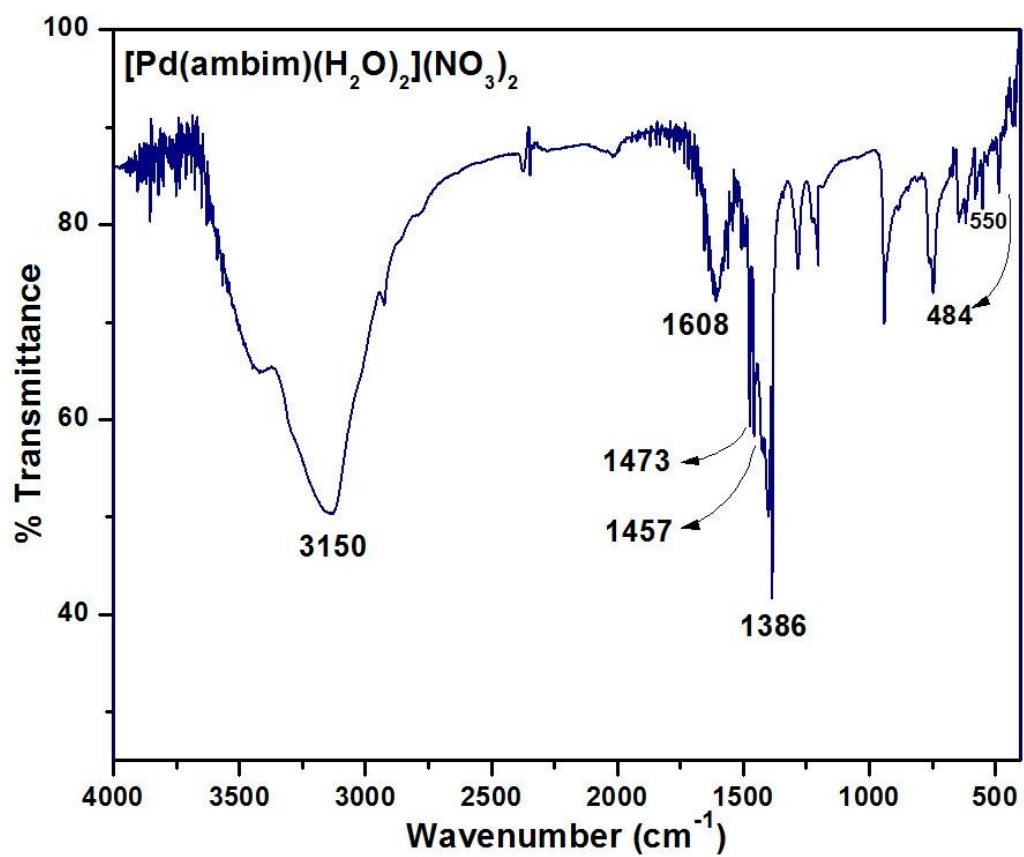

Sup. Fig. S4 IR spectrum of **C2**

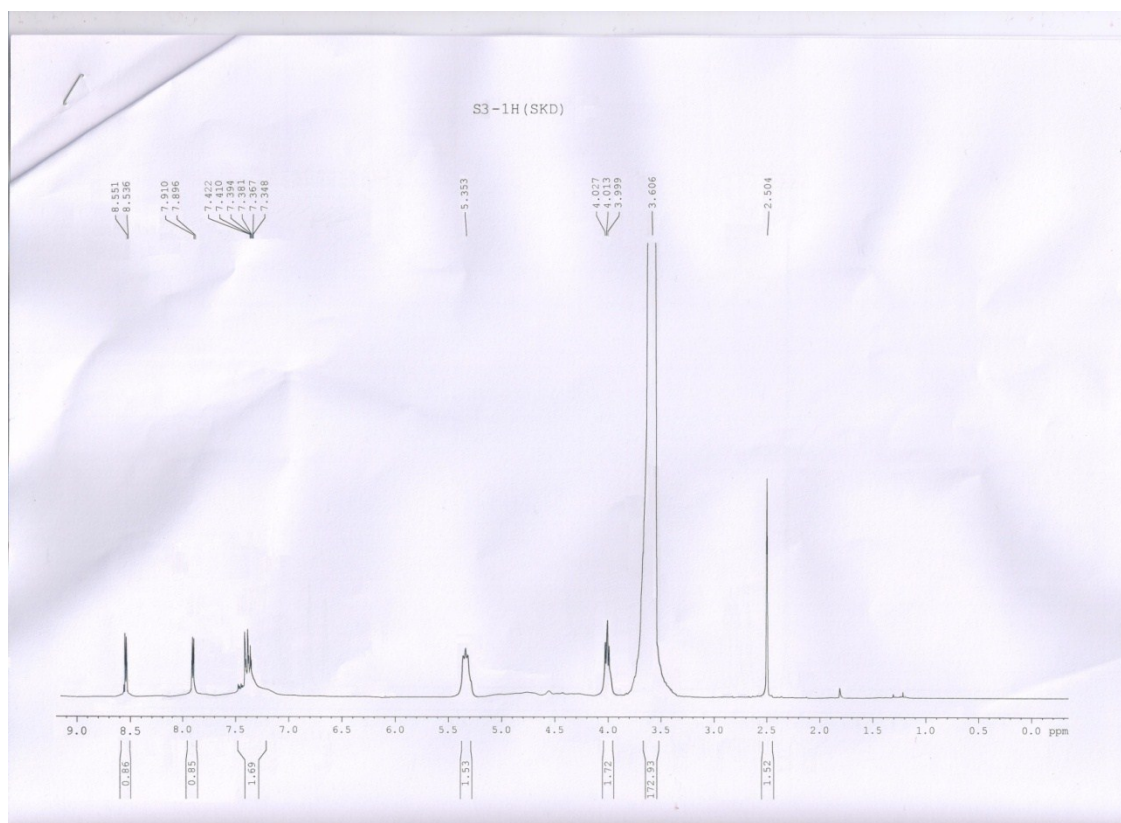

Sup. Fig. S5  $^1\text{H}$  NMR spectrum of **C2** in mixed solvent  $\text{DMSO-D}_6$

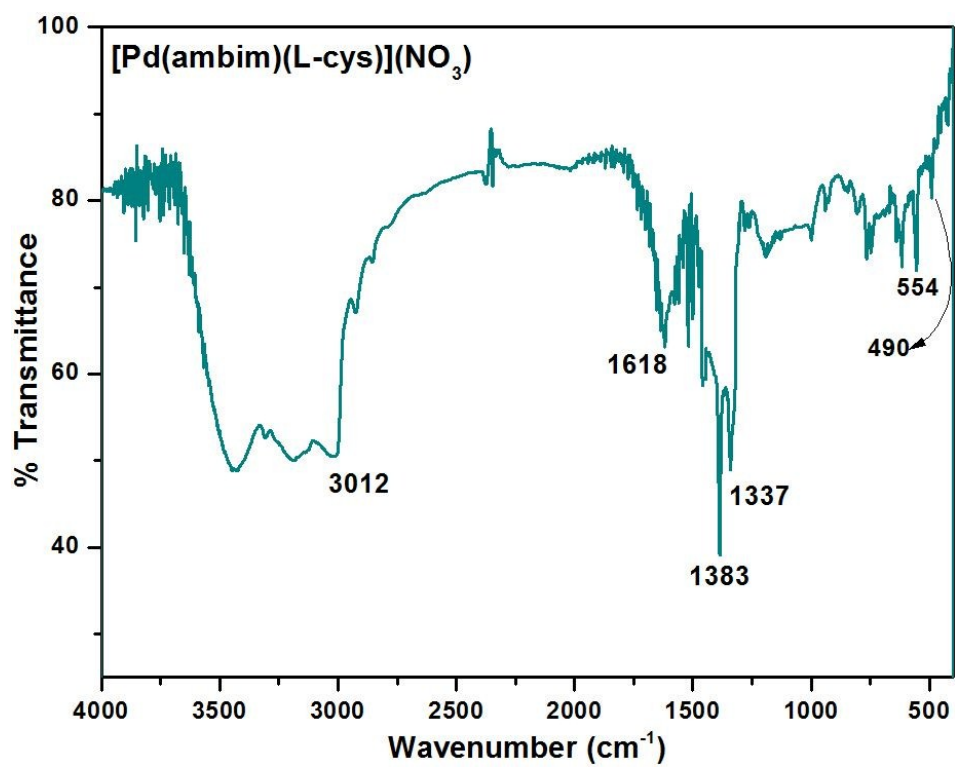

Sup. Fig. S6 IR spectrum of **C3**

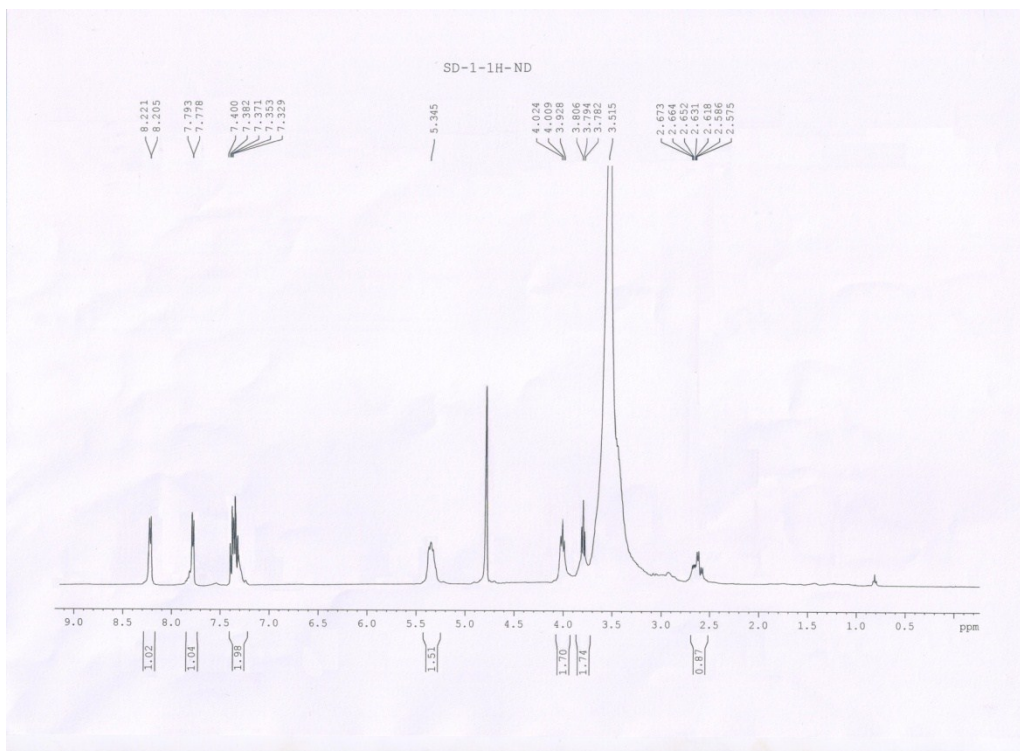

Sup. Fig. S7  $^1\text{H}$  NMR spectrum of **C3** in  $\text{D}_2\text{O}$

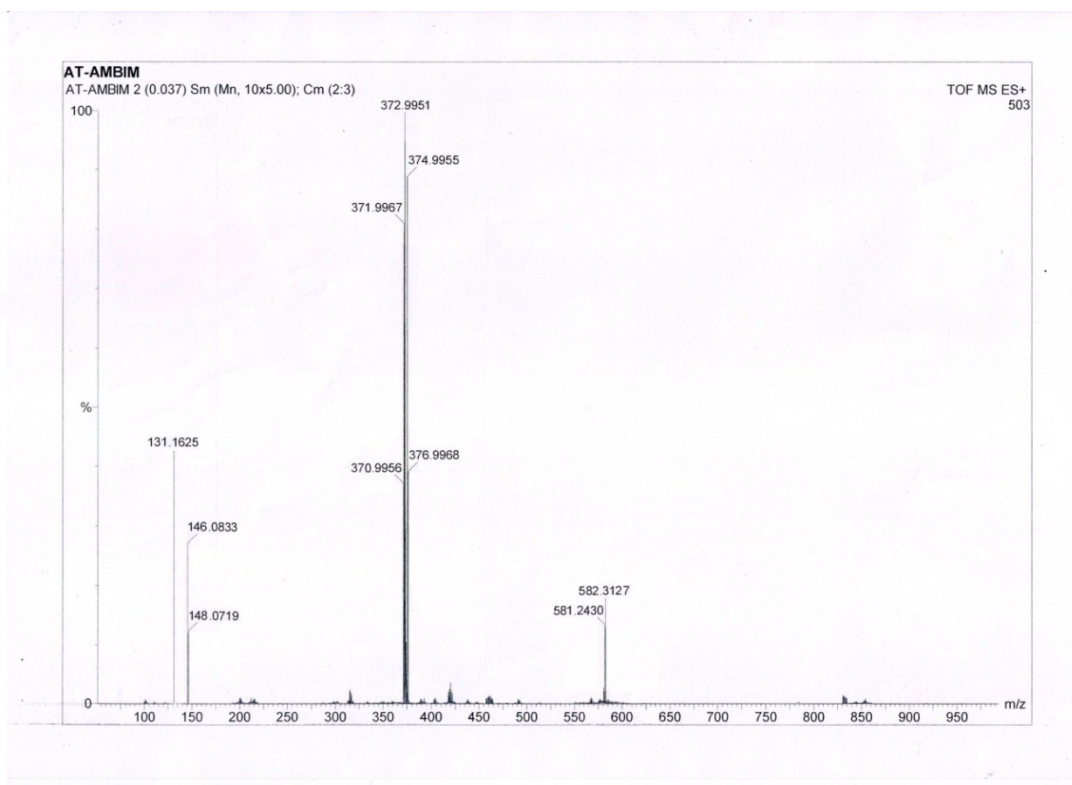

Sup. Fig. S8 ESI-Mass spectrum of **C3** in water



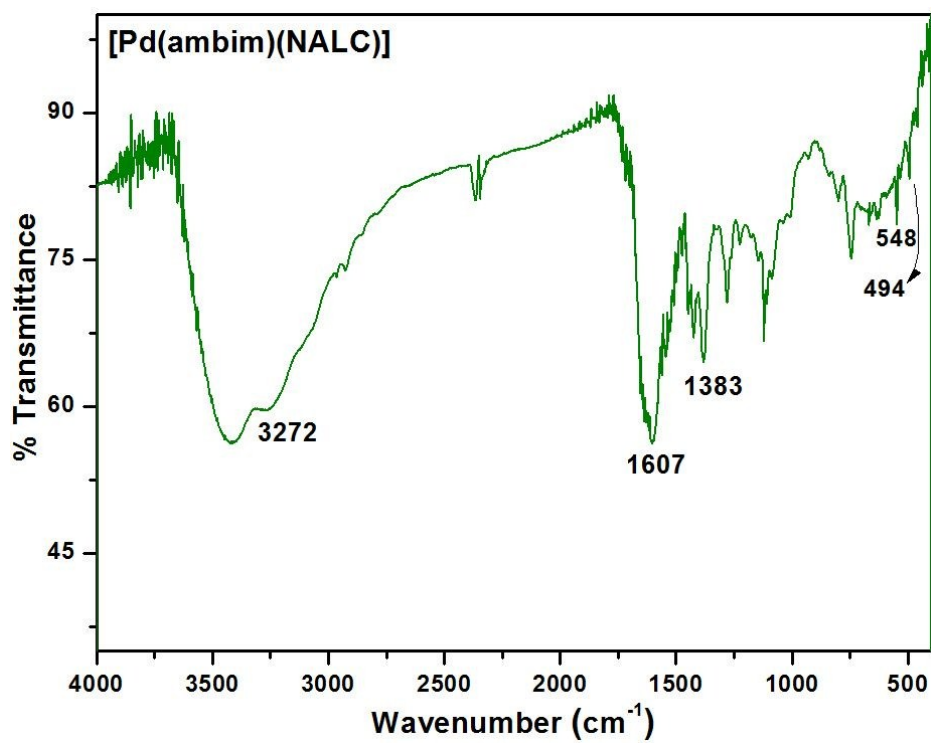

Sup. Fig. S9 IR spectrum of **C4**

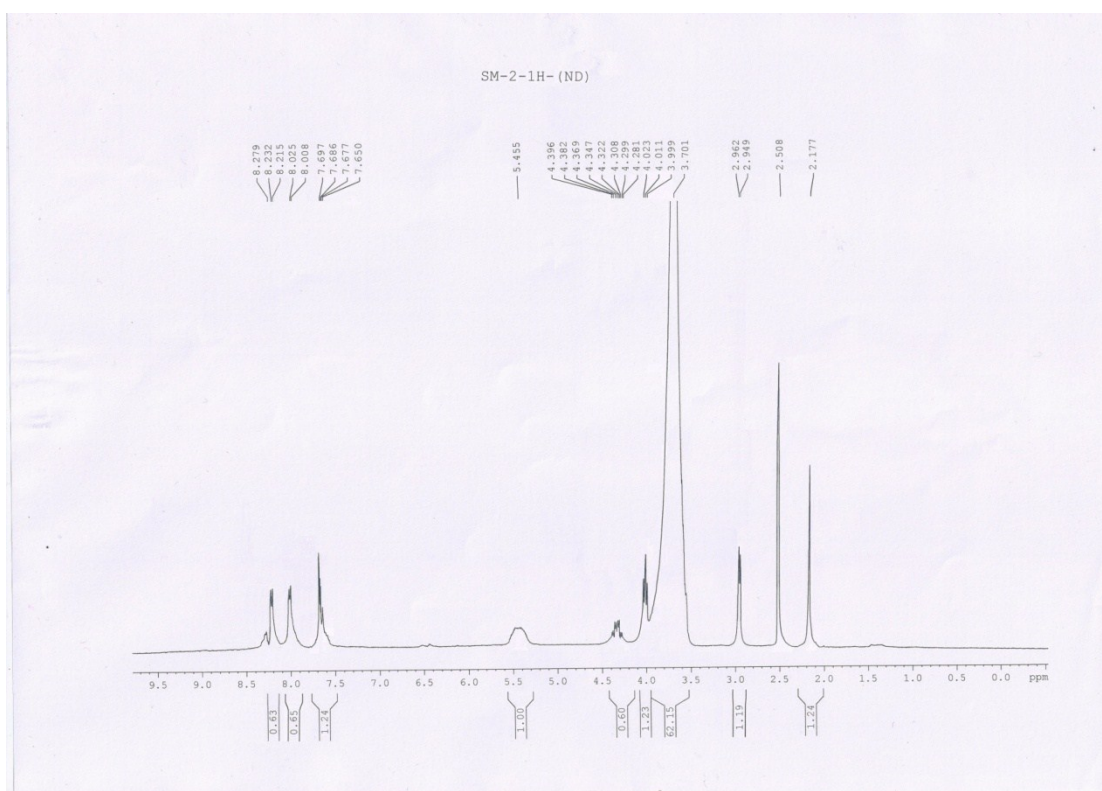

Sup. Fig. S10 <sup>1</sup>H NMR spectrum of **C4** in DMSO-D<sub>6</sub>

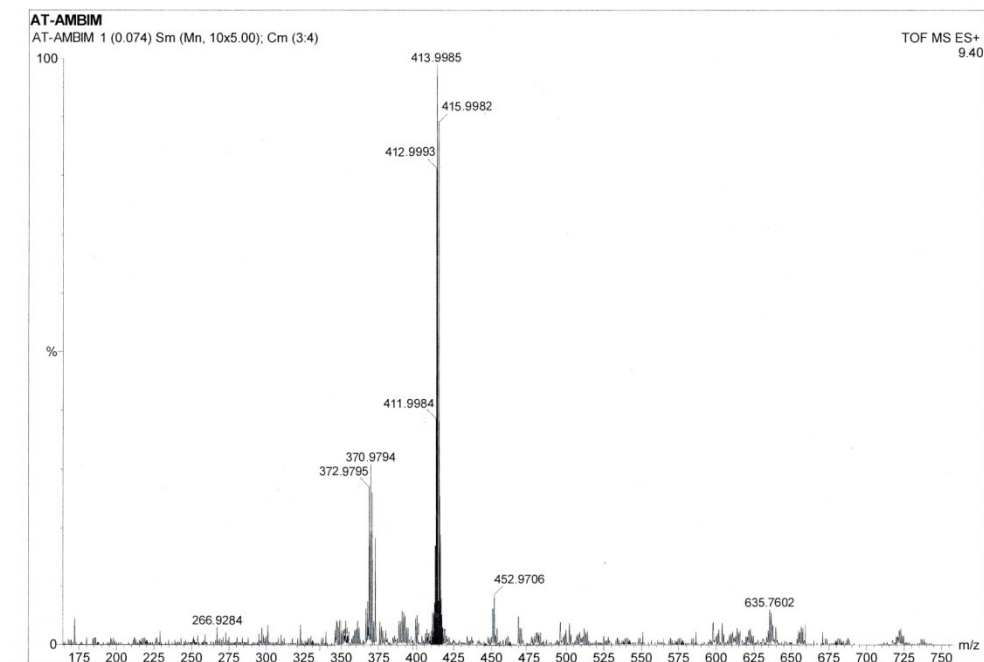

Sup. Fig. S11 ESI-Mass spectrum of **C4** in water

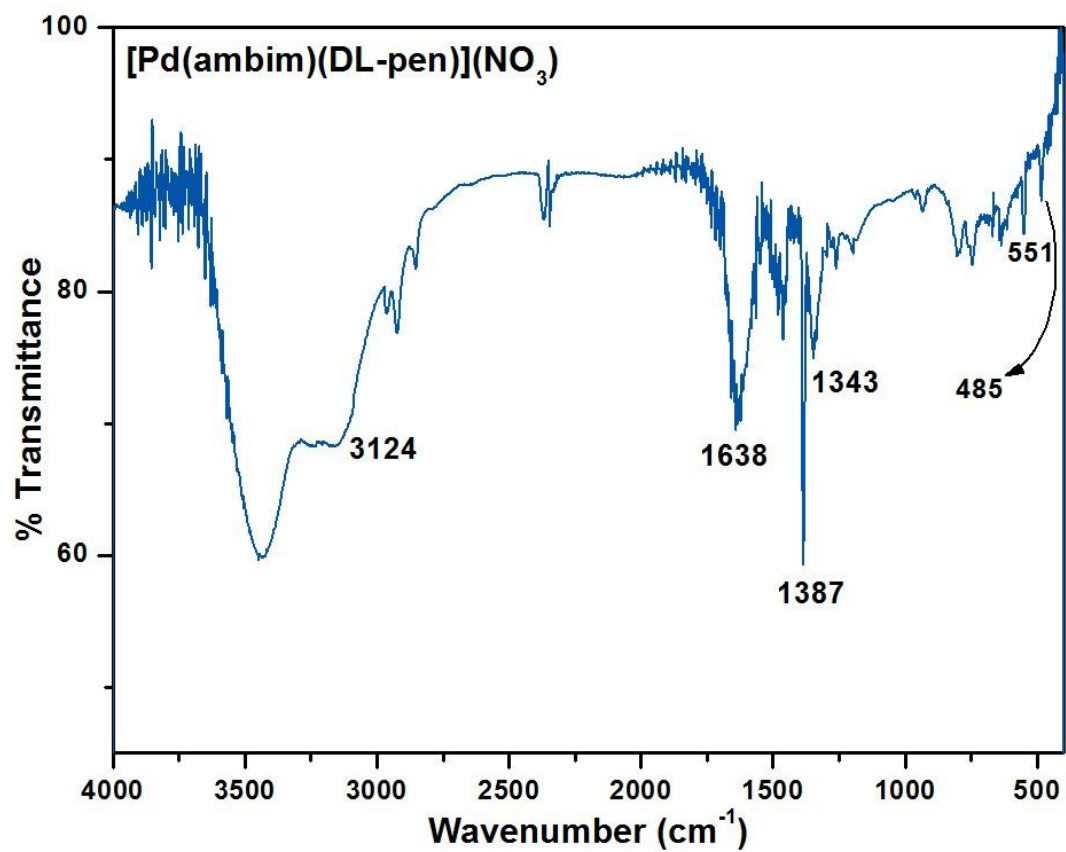

Sup. Fig. S12 IR spectrum of **C5**



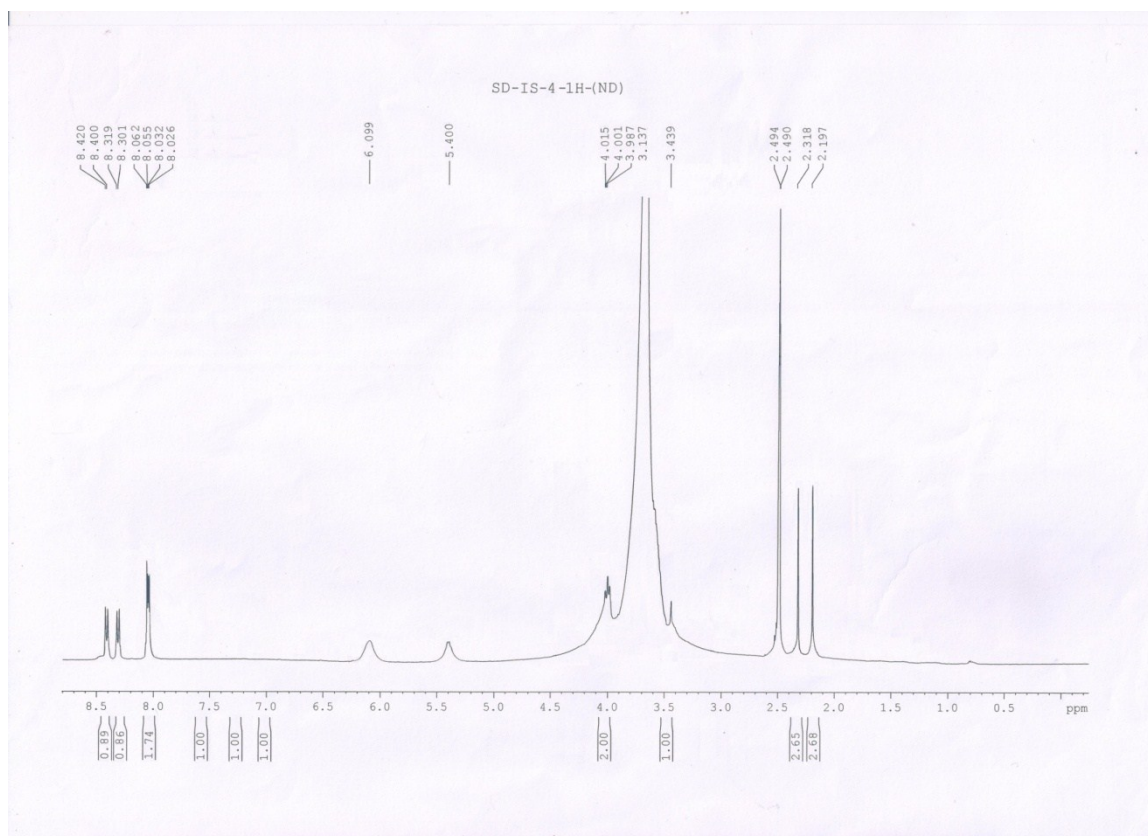

Sup. Fig. S13  $^1\text{H}$  NMR spectrum of **C5** in  $\text{DMSO-D}_6$

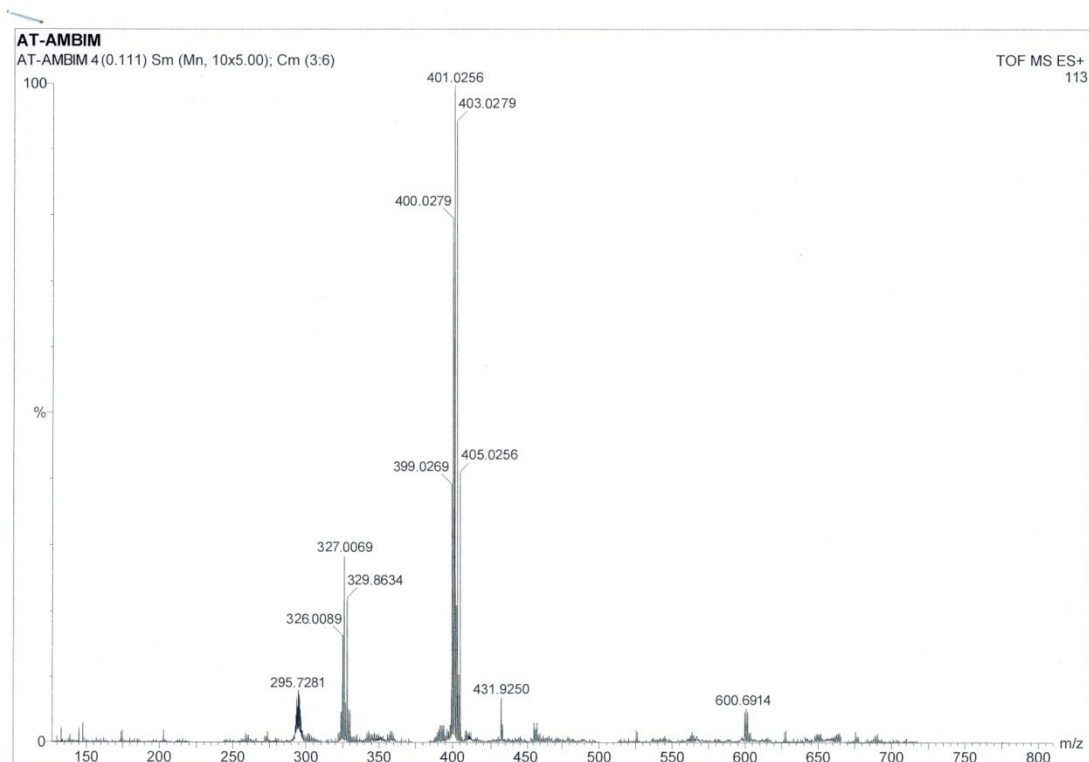

Sup. Fig. S14 ESI-Mass spectrum of **C5** in water

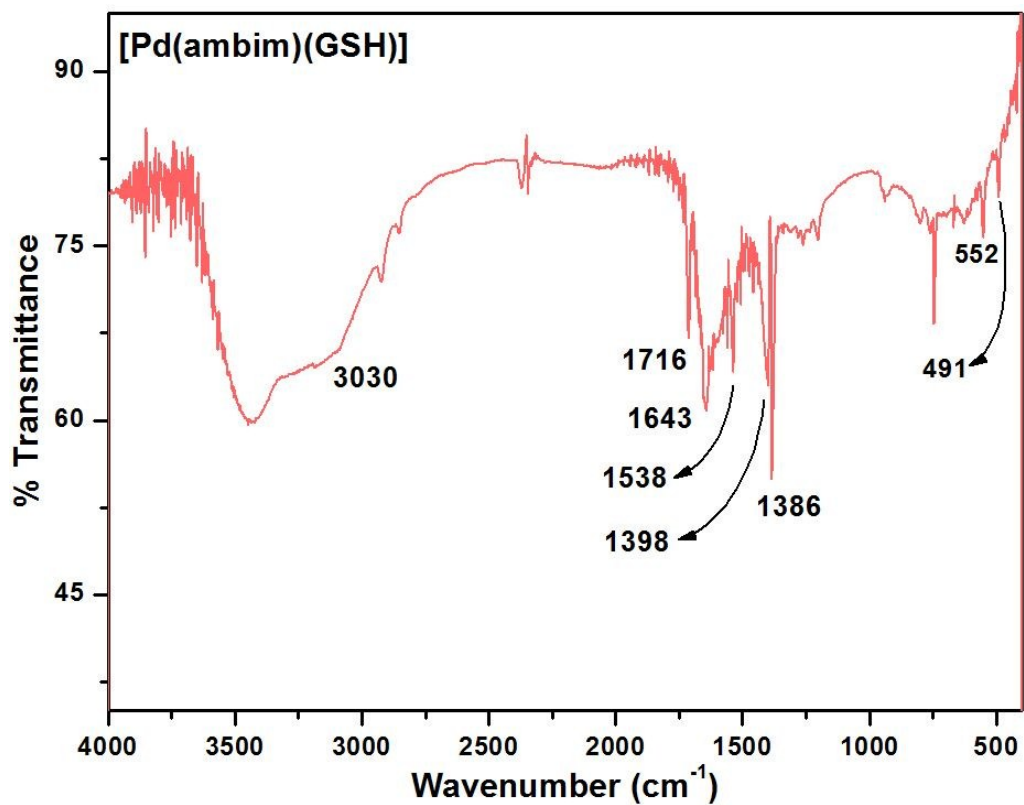

Sup. Fig. S15 IR spectrum of **C6**

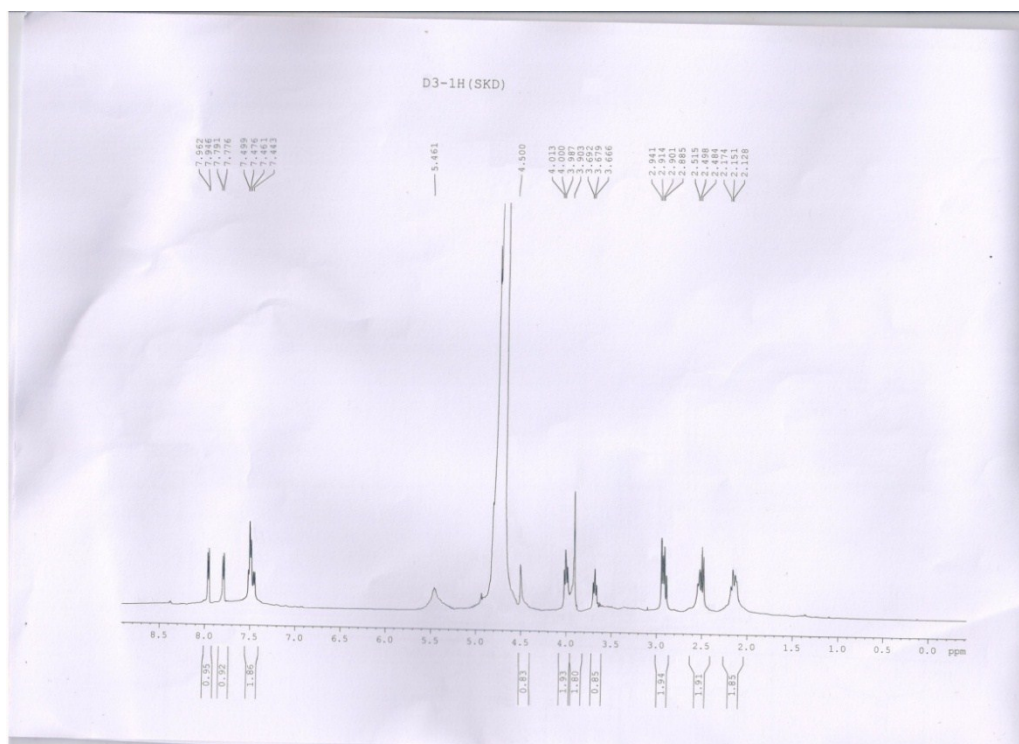

Sup. Fig. S16 <sup>1</sup>H NMR spectrum of **C6** in D<sub>2</sub>O

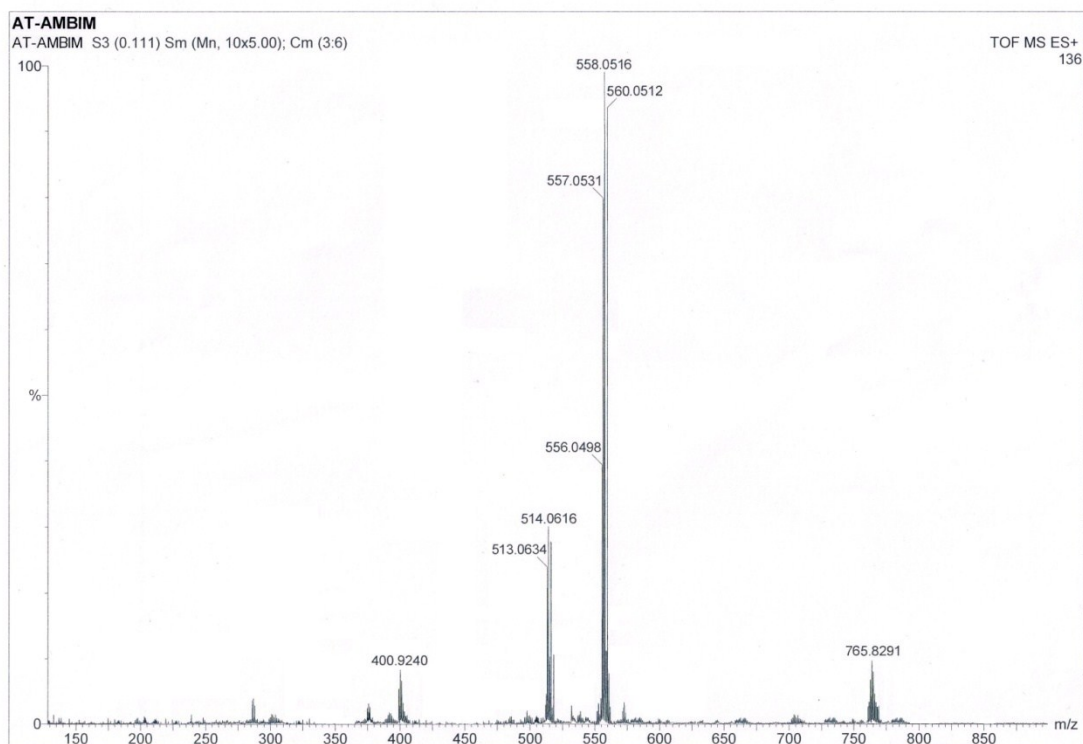

Sup. Fig. S17 ESI-Mass spectrum of **C6** in water

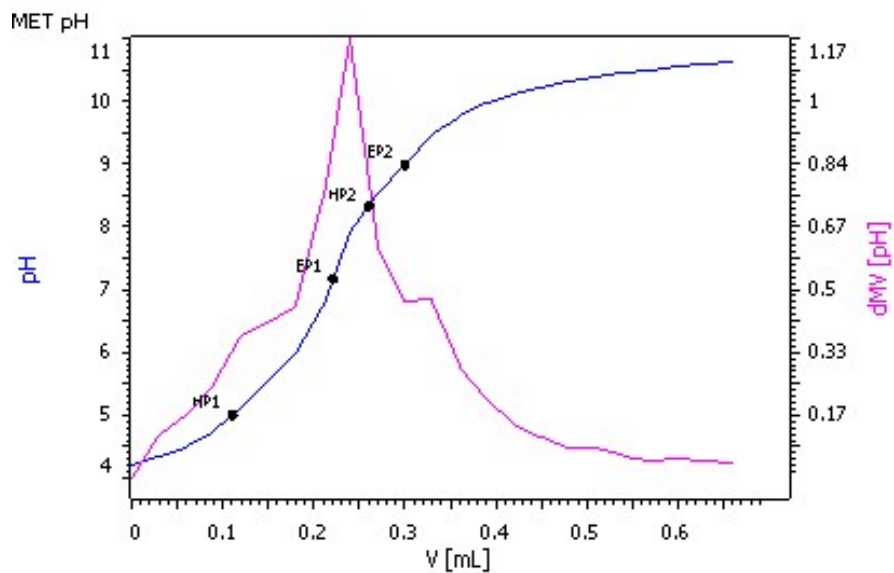

Sup. Fig. S18 Plot of pH vs volume (mL) for the titration of  $1.00 \times 10^{-4}$  M solution of **C2** using standard 0.025 M KOH.

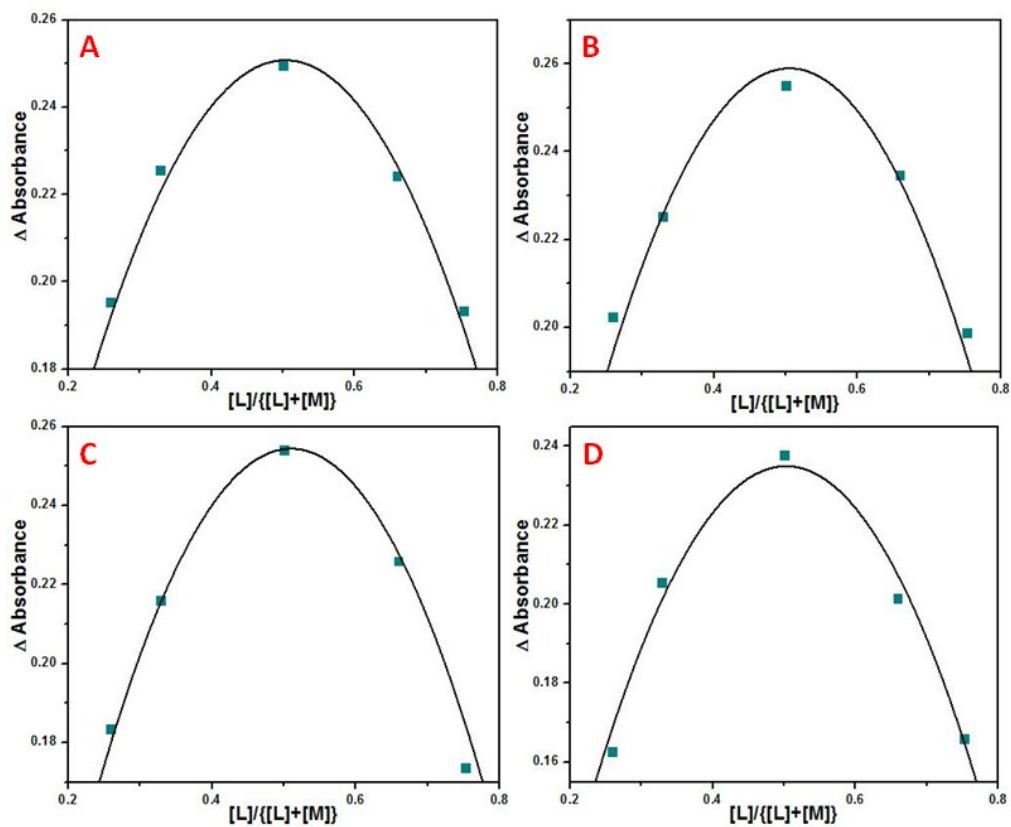

Sup. Fig. S19 Job's plot for the formation of complexes **C3-C6** at pH 4.0.

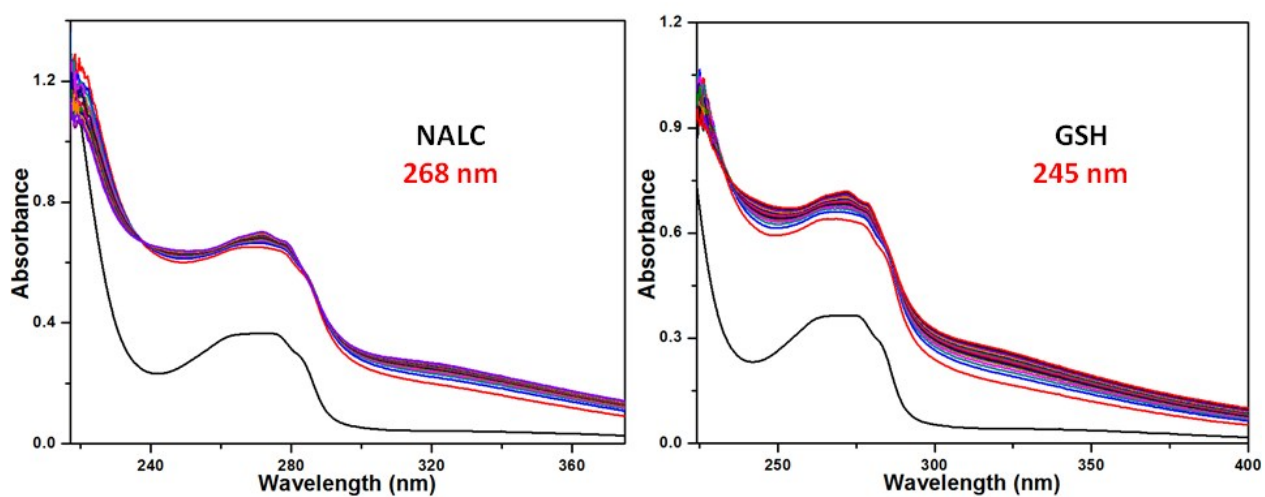

Sup. Fig. S20 Scan overlay at 2-min interval of the reaction of **C2** with NALC and GSH.  $[C2] = 4.71 \times 10^{-4}$  M,  $[NALC/GSH] = 4.71 \times 10^{-3}$  M, pH = 4.0, 25 °C.

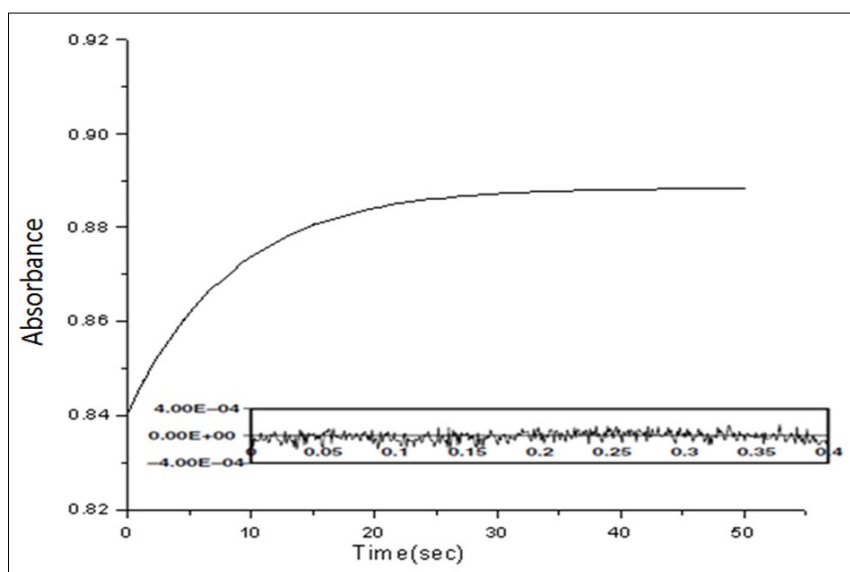

Sup. Fig. S21 Typical absorbance-time trace for the reaction of **C2** with L-cys fitted with two exponential functions. The top of the figure shows the absorbance difference between measured and calculated kinetic traces.  $[C2] = 4.71 \times 10^{-4} \text{ M}$ ;  $[L\text{-cys}] = 4.71 \times 10^{-3} \text{ M}$ ;  $\text{pH} = 4.0$ ,  $\lambda = 250 \text{ nm}$ ;  $T = 25 \text{ }^\circ\text{C}$ .

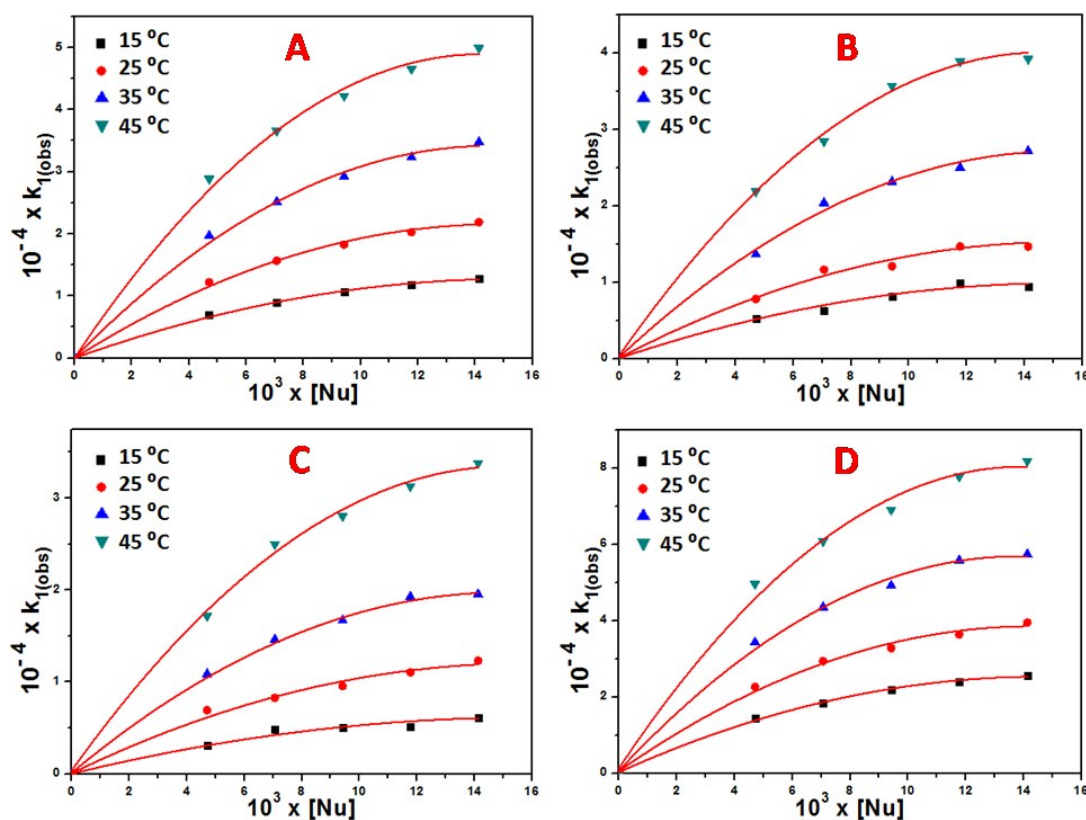

Sup. Fig. S22 Plot of  $10^{-4} \times k_{1(\text{obs})}$  versus  $10^3 \times [\text{Nu}]$  at different temperatures. (A) L-cys, (B) NALC, (C) DL-pen, (D) GSH



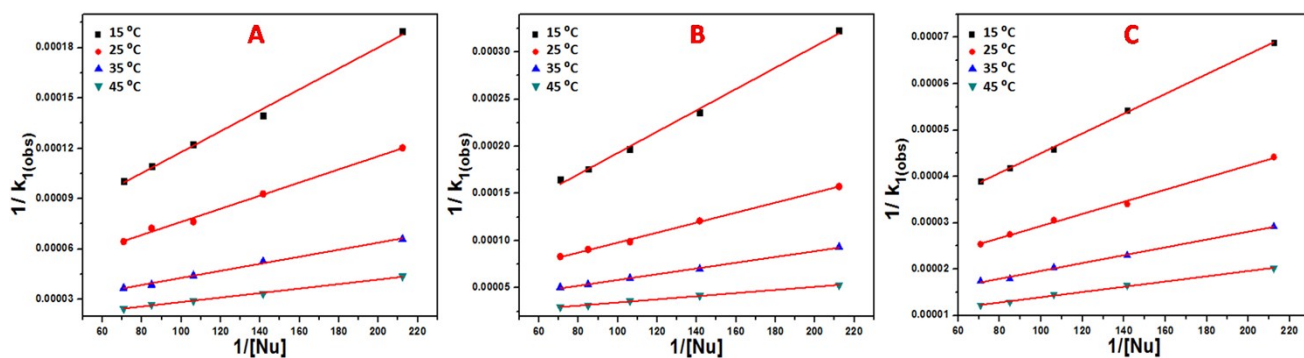

Sup. Fig. S23 Plot of  $1/k_{1(\text{obs})}$  versus  $1/[\text{Nu}]$  at different temperatures. (A) NALC, (B) DL-pen, (C) GSH

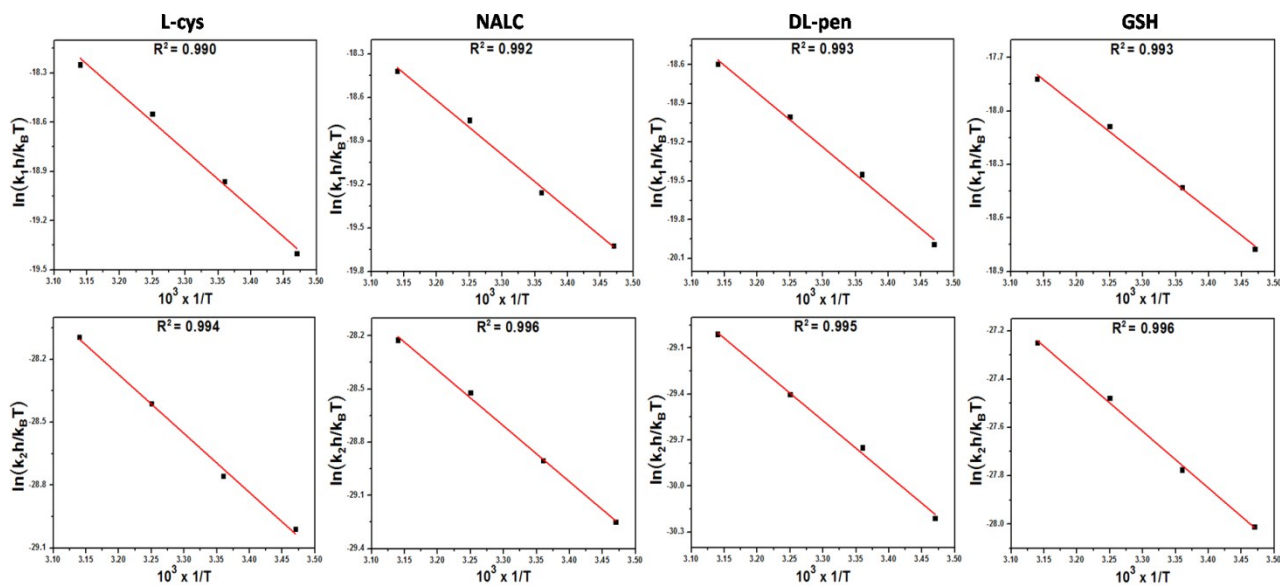

Sup. Fig. S24 Eyring plots ( $\ln k_1h/k_B T$  vs  $10^3 \times 1/T$  and  $\ln k_2h/k_B T$  vs  $10^3 \times 1/T$ ) for the reaction of **C2** with L-cys, NALC, DL-pen and GSH.

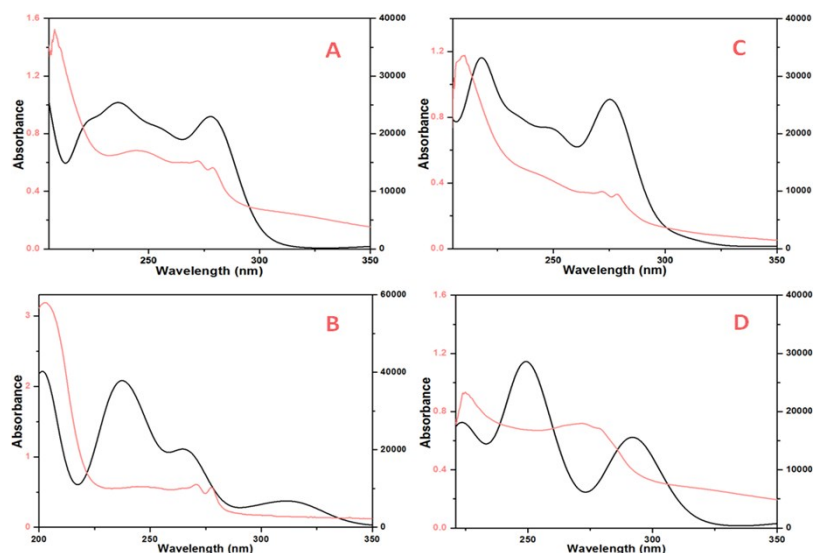

Sup. Fig. S25 Experimental (in pink) and simulated (in black) UV-Vis spectrum of the Pd(II) complexes **C3-C6** in CPCM/water (Simulation done at TDDFT/B3LYP/6-31G(d)/6-31G+(d)/LANL2DZ level of theory).

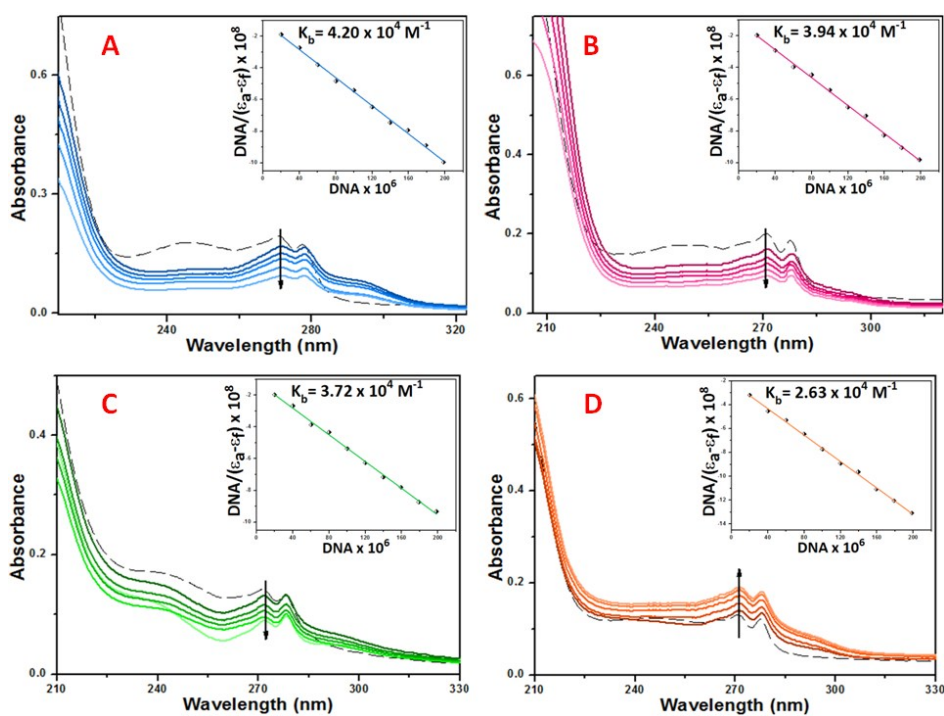

Sup. Fig. S26 UV spectra of 20  $\mu\text{M}$  of (A) **C3** (B) **C4** (C) **C5** and (D) **C6** in Tris-HCl buffer in the presence of increasing amounts of CT-DNA (0–200  $\mu\text{M}$ ). The arrow indicates the changes in the absorbance on addition of DNA. Inset: linear fit of  $[\text{DNA}]/(\epsilon_a - \epsilon_f)$  vs.  $[\text{DNA}]$ .

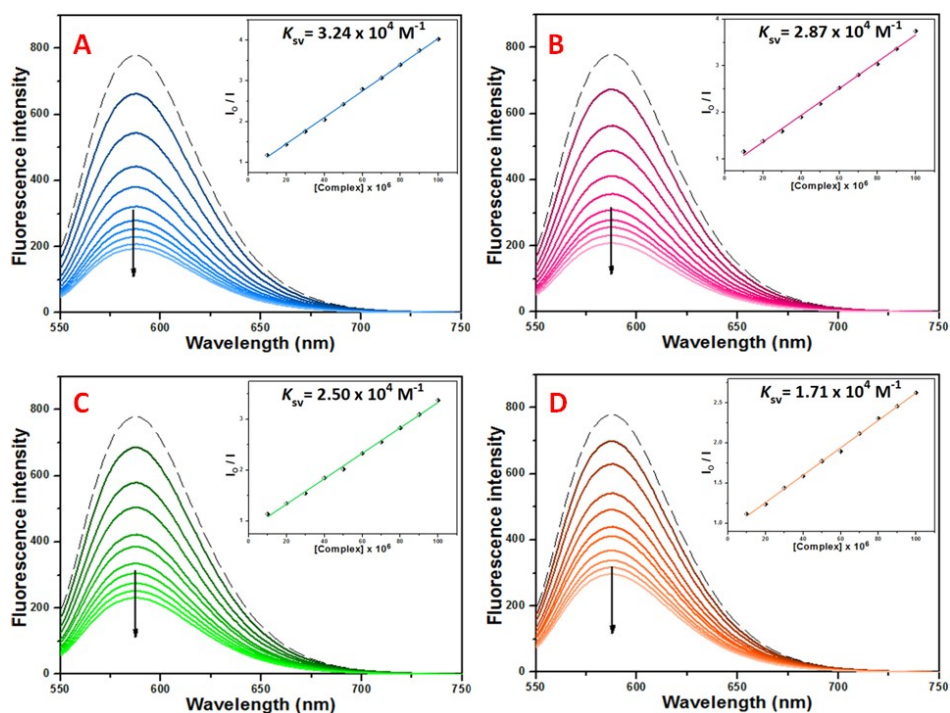

Sup. Fig. S27 Emission spectra for EB–DNA ([EB] = 20  $\mu$ M, [DNA] = 20  $\mu$ M) in the absence and presence of increasing amounts of (A) **C3** (B) **C4** (C) **C5** and (D) **C6**. The arrow shows the changes of intensity upon increasing amount of complexes. Inset: Plot of  $I_0/I$  versus [complex].

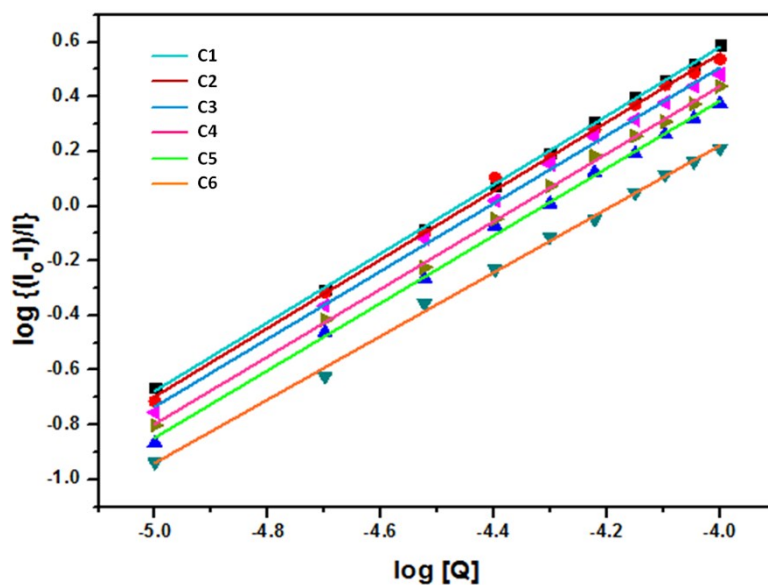

Sup. Fig. S28 Scatchard plot for DNA binding of complexes **C1-C6**.

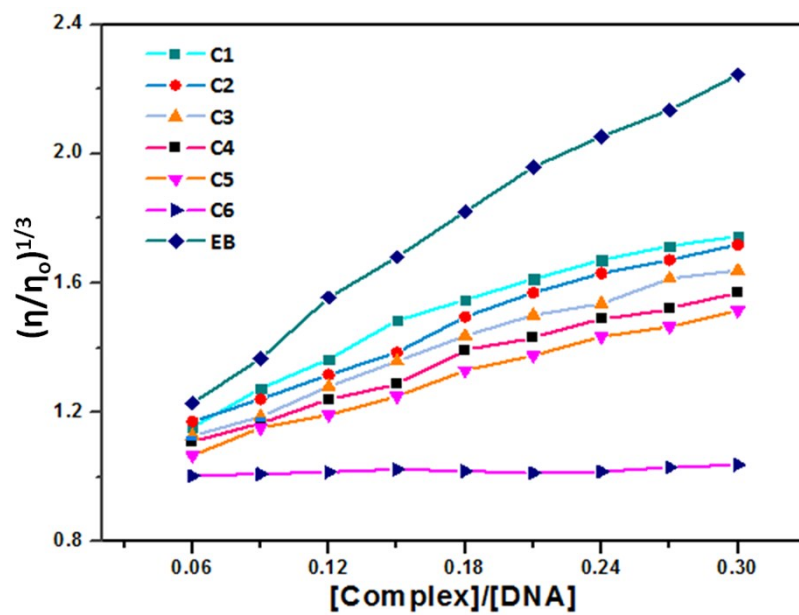

Sup. Fig. S29 Effect of increasing amounts of EB and studied Pd(II) complexes on the relative viscosity of CT-DNA at 25°C.

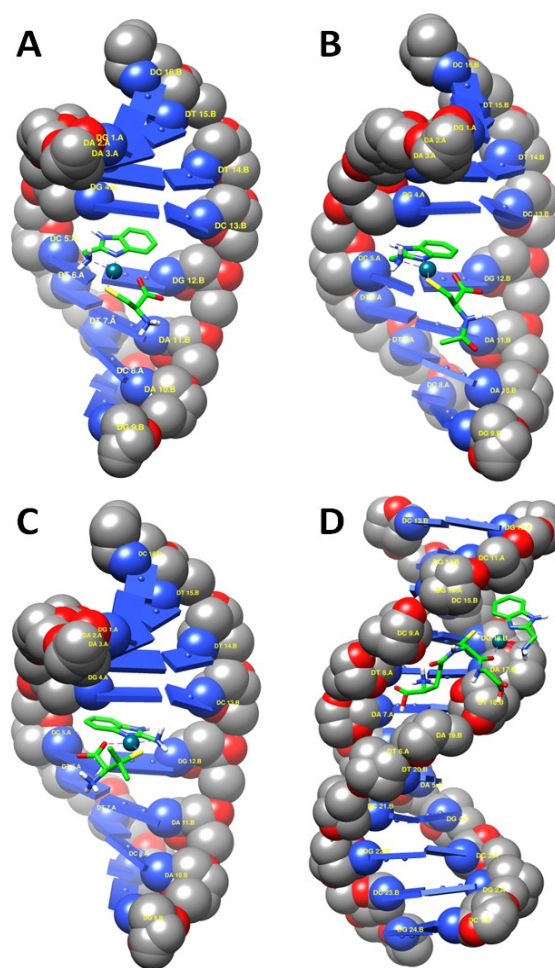

Sup. Fig. S30 Computational docking models illustrating the interactions of (A)C3, (B)C4, (C)C5 with 1DNE and (D) C6 with 1DSC.

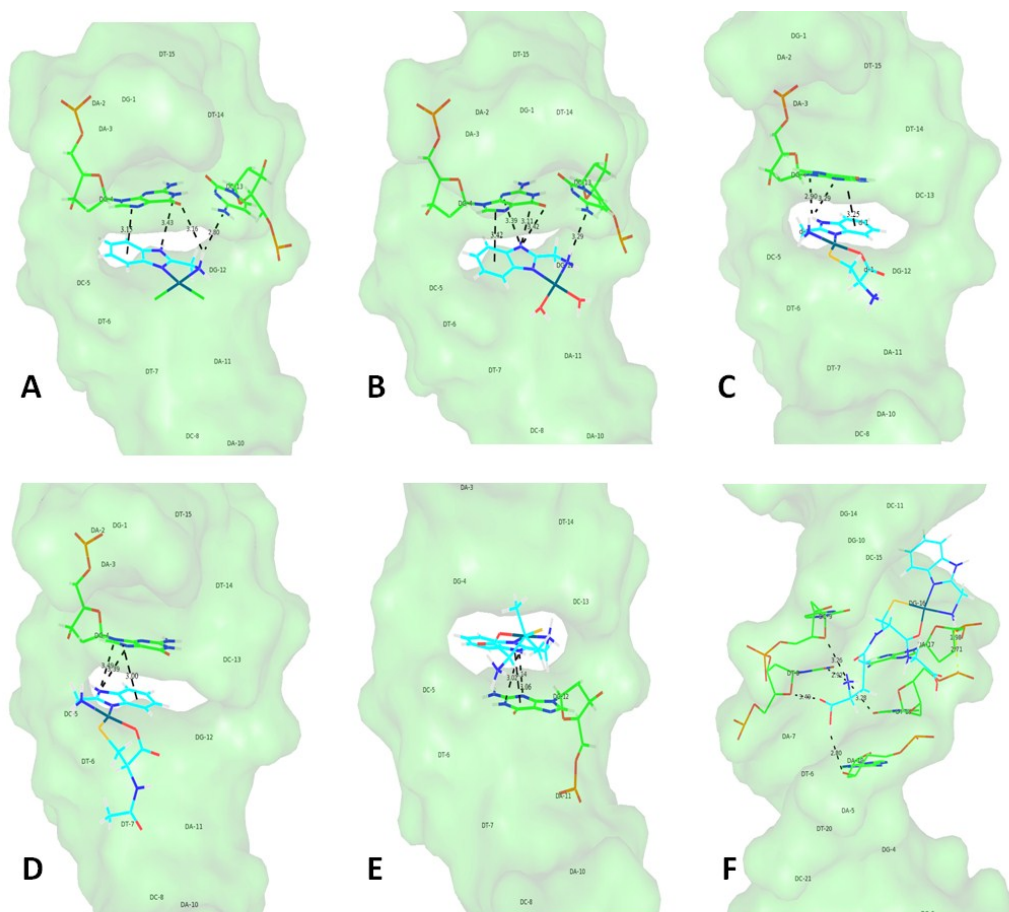

SUP. Fig. S31 Magnified view of docked model showing the interaction of DNA bases with (A) **C1**, (B) **C2**, (C) **C3**, (D) **C4**, (E) **C5** and (F) **C6**.

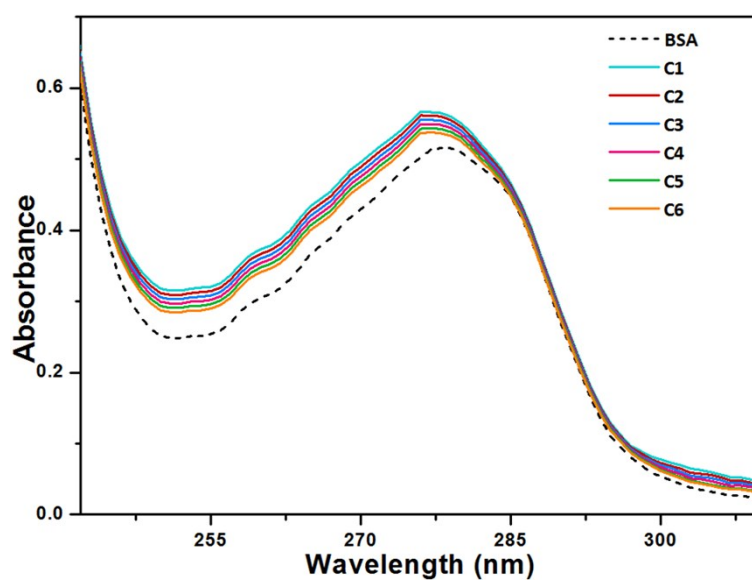

Sup. Fig. S32 Absorption spectra of BSA (10  $\mu$ M) in Tris-HCl buffer in presence of the complexes **C1**–**C6** (5  $\mu$ M).



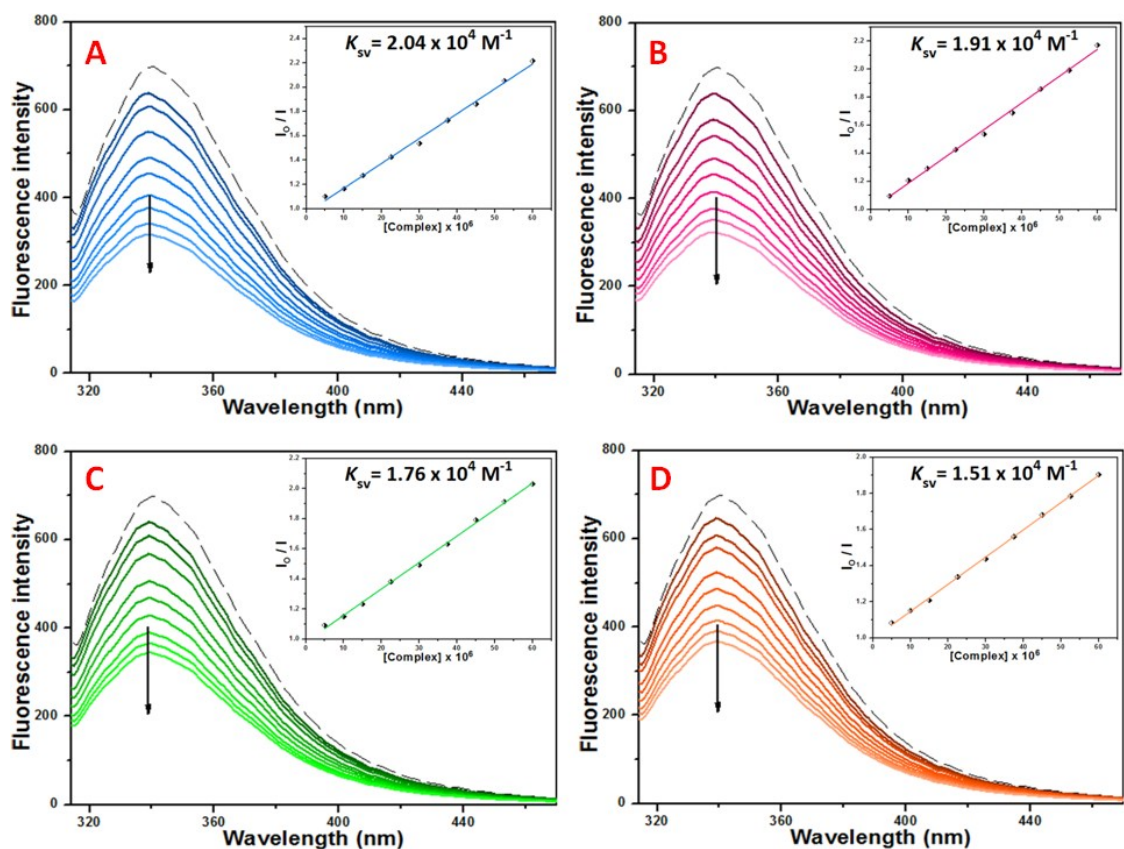

Sup. Fig. S33 Emission spectra of BSA (1.0  $\mu\text{M}$ ) in Tris-HCl buffer (pH 7.0) at 298 K in presence of (A) **C3**, (B) **C4**, (C) **C5** and (D) **C6** (5-60  $\mu\text{M}$ ). The arrow shows the emission intensity changes upon increasing complex concentration. Insets: Stern-Volmer plot showing tryptophan quenching in BSA.

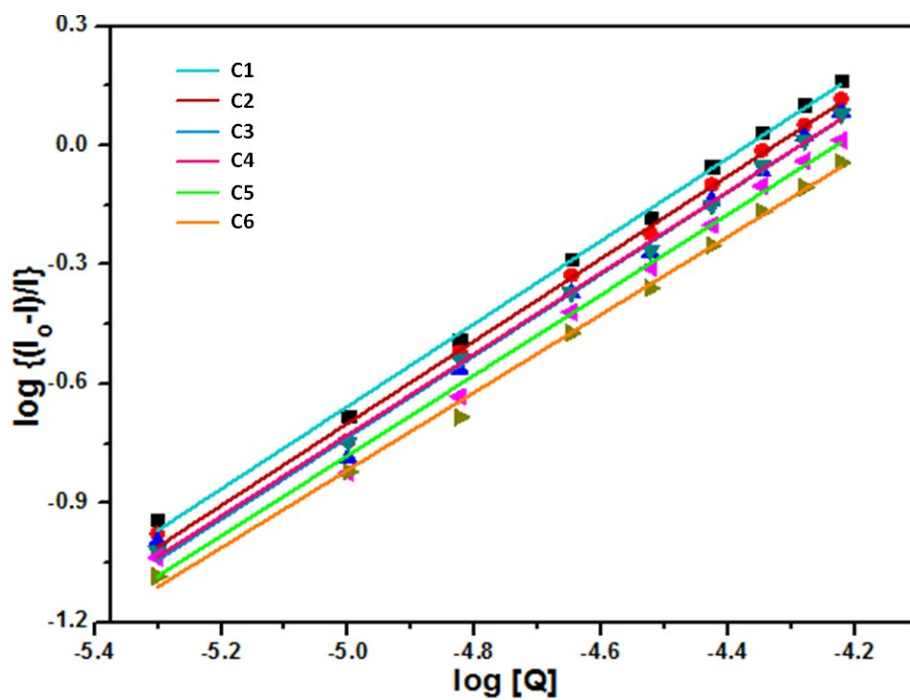

Sup. Fig. S34 Scatchard plot for BSA binding of complexes **C1-C6**.

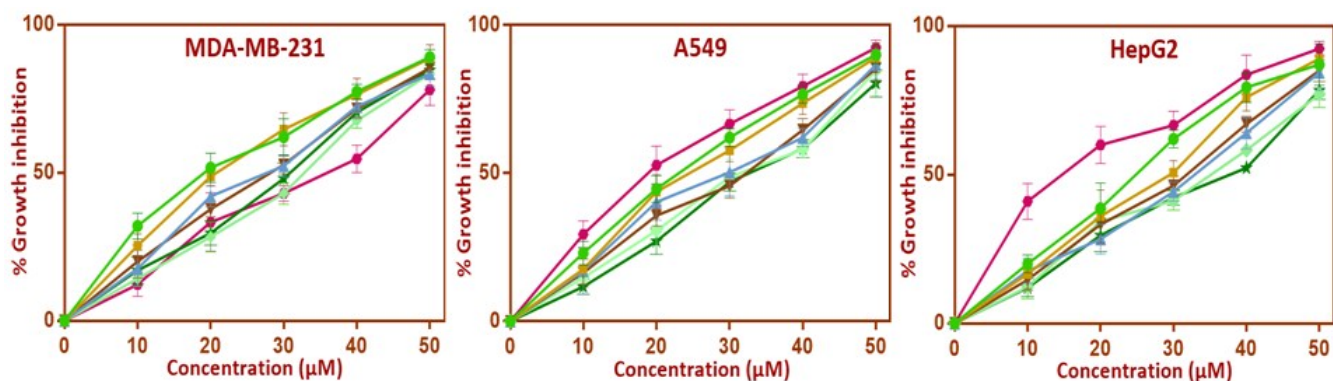

Sup. Fig. S35 Growth Inhibition (%) of MDA-MB-231, A549, and HepG2 cell lines in presence of complex **C1-C6** and Cisplatin (5-50  $\mu\text{M}$ ).

Sup. Table S1.  $10^{-3} \times k_{1(\text{obs})}$  ( $\text{s}^{-1}$ ) and  $k_{2(\text{obs})}$  ( $\text{s}^{-1}$ ) values at different [ligand] at different temperatures; **[C2]** =  $4.71 \times 10^{-4}$  M, pH = 4.0, ionic strength = 0.1 M  $\text{NaClO}_4$  (Herein “ $\pm$  values” represent standard error values)

| Ligand | Conc. ( $\times 10^3$ M) | $k_{1(\text{obs})} \times 10^{-3}$ ( $\text{s}^{-1}$ ) |                     |                     |                     | $k_{2(\text{obs})}$ ( $\text{s}^{-1}$ ) |                     |                     |                     |
|--------|--------------------------|--------------------------------------------------------|---------------------|---------------------|---------------------|-----------------------------------------|---------------------|---------------------|---------------------|
|        |                          | 15 $^\circ\text{C}$                                    | 25 $^\circ\text{C}$ | 35 $^\circ\text{C}$ | 45 $^\circ\text{C}$ | 15 $^\circ\text{C}$                     | 25 $^\circ\text{C}$ | 35 $^\circ\text{C}$ | 45 $^\circ\text{C}$ |
| L-cys  | 4.71                     | 3.26 $\pm$ 0.08                                        | 5.75 $\pm$ 0.06     | 9.27 $\pm$ 0.09     | 13.58 $\pm$ 0.11    | 1.51 $\pm$ 0.04                         | 1.97 $\pm$ 0.04     | 2.90 $\pm$ 0.06     | 4.13 $\pm$ 0.05     |
|        | 7.06                     | 4.24 $\pm$ 0.03                                        | 7.38 $\pm$ 0.05     | 11.84 $\pm$ 0.07    | 17.22 $\pm$ 0.08    | 1.55 $\pm$ 0.07                         | 2.01 $\pm$ 0.03     | 2.94 $\pm$ 0.04     | 4.20 $\pm$ 0.10     |
|        | 9.42                     | 4.99 $\pm$ 0.07                                        | 8.60 $\pm$ 0.04     | 13.75 $\pm$ 0.03    | 19.88 $\pm$ 0.04    | 1.46 $\pm$ 0.08                         | 2.03 $\pm$ 0.02     | 3.00 $\pm$ 0.07     | 4.17 $\pm$ 0.06     |
|        | 11.77                    | 5.58 $\pm$ 0.04                                        | 9.55 $\pm$ 0.07     | 15.21 $\pm$ 0.10    | 21.91 $\pm$ 0.05    | 1.43 $\pm$ 0.03                         | 1.96 $\pm$ 0.06     | 3.02 $\pm$ 0.03     | 4.23 $\pm$ 0.08     |
|        | 14.13                    | 6.06 $\pm$ 0.12                                        | 10.30 $\pm$ 0.12    | 16.38 $\pm$ 0.06    | 23.51 $\pm$ 0.09    | 1.60 $\pm$ 0.02                         | 2.08 $\pm$ 0.06     | 2.84 $\pm$ 0.10     | 4.12 $\pm$ 0.09     |
| NALC   | 4.71                     | 2.48 $\pm$ 0.03                                        | 3.91 $\pm$ 0.06     | 7.15 $\pm$ 0.08     | 10.78 $\pm$ 0.10    | 1.15 $\pm$ 0.04                         | 1.69 $\pm$ 0.01     | 2.66 $\pm$ 0.04     | 3.71 $\pm$ 0.07     |
|        | 7.06                     | 3.38 $\pm$ 0.08                                        | 5.07 $\pm$ 0.09     | 8.95 $\pm$ 0.07     | 14.11 $\pm$ 0.06    | 1.23 $\pm$ 0.02                         | 1.74 $\pm$ 0.04     | 2.61 $\pm$ 0.06     | 3.66 $\pm$ 0.05     |
|        | 9.42                     | 3.84 $\pm$ 0.11                                        | 6.17 $\pm$ 0.03     | 10.66 $\pm$ 0.05    | 16.14 $\pm$ 0.08    | 1.19 $\pm$ 0.07                         | 1.78 $\pm$ 0.08     | 2.59 $\pm$ 0.02     | 3.59 $\pm$ 0.04     |
|        | 11.77                    | 4.32 $\pm$ 0.02                                        | 6.50 $\pm$ 0.07     | 12.17 $\pm$ 0.09    | 17.49 $\pm$ 0.05    | 1.13 $\pm$ 0.03                         | 1.69 $\pm$ 0.07     | 2.70 $\pm$ 0.03     | 3.74 $\pm$ 0.08     |
|        | 14.13                    | 4.69 $\pm$ 0.05                                        | 7.31 $\pm$ 0.09     | 12.78 $\pm$ 0.04    | 19.34 $\pm$ 0.12    | 1.27 $\pm$ 0.08                         | 1.80 $\pm$ 0.05     | 2.64 $\pm$ 0.09     | 3.60 $\pm$ 0.03     |
| DL-pen | 4.71                     | 1.46 $\pm$ 0.12                                        | 2.99 $\pm$ 0.04     | 5.05 $\pm$ 0.07     | 8.89 $\pm$ 0.03     | 0.53 $\pm$ 0.04                         | 0.75 $\pm$ 0.03     | 1.09 $\pm$ 0.07     | 1.63 $\pm$ 0.05     |
|        | 7.06                     | 2.00 $\pm$ 0.04                                        | 3.89 $\pm$ 0.05     | 6.75 $\pm$ 0.10     | 11.29 $\pm$ 0.09    | 0.46 $\pm$ 0.03                         | 0.69 $\pm$ 0.05     | 1.13 $\pm$ 0.04     | 1.72 $\pm$ 0.02     |
|        | 9.42                     | 2.39 $\pm$ 0.07                                        | 4.77 $\pm$ 0.08     | 7.86 $\pm$ 0.03     | 13.06 $\pm$ 0.05    | 0.51 $\pm$ 0.07                         | 0.78 $\pm$ 0.08     | 1.05 $\pm$ 0.06     | 1.67 $\pm$ 0.06     |
|        | 11.77                    | 2.68 $\pm$ 0.09                                        | 5.20 $\pm$ 0.09     | 8.80 $\pm$ 0.05     | 15.00 $\pm$ 0.06    | 0.40 $\pm$ 0.05                         | 0.80 $\pm$ 0.02     | 1.02 $\pm$ 0.03     | 1.63 $\pm$ 0.08     |
|        | 14.13                    | 2.86 $\pm$ 0.05                                        | 5.66 $\pm$ 0.13     | 9.34 $\pm$ 0.06     | 15.85 $\pm$ 0.11    | 0.41 $\pm$ 0.06                         | 0.73 $\pm$ 0.04     | 1.16 $\pm$ 0.08     | 1.70 $\pm$ 0.05     |
| GSH    | 4.71                     | 6.84 $\pm$ 0.08                                        | 10.66 $\pm$ 0.09    | 16.13 $\pm$ 0.04    | 23.35 $\pm$ 0.07    | 4.17 $\pm$ 0.02                         | 5.38 $\pm$ 0.07     | 7.56 $\pm$ 0.06     | 9.70 $\pm$ 0.08     |
|        | 7.06                     | 8.67 $\pm$ 0.13                                        | 13.83 $\pm$ 0.07    | 20.50 $\pm$ 0.10    | 28.64 $\pm$ 0.07    | 4.11 $\pm$ 0.07                         | 5.42 $\pm$ 0.08     | 7.39 $\pm$ 0.05     | 9.69 $\pm$ 0.05     |
|        | 9.42                     | 10.28 $\pm$ 0.06                                       | 15.42 $\pm$ 0.05    | 23.14 $\pm$ 0.09    | 32.51 $\pm$ 0.13    | 4.08 $\pm$ 0.03                         | 5.31 $\pm$ 0.04     | 7.47 $\pm$ 0.03     | 9.80 $\pm$ 0.07     |
|        | 11.77                    | 11.27 $\pm$ 0.05                                       | 17.13 $\pm$ 0.08    | 26.26 $\pm$ 0.07    | 36.58 $\pm$ 0.09    | 4.01 $\pm$ 0.06                         | 5.43 $\pm$ 0.03     | 7.50 $\pm$ 0.04     | 9.65 $\pm$ 0.06     |
|        | 14.13                    | 12.07 $\pm$ 0.03                                       | 18.58 $\pm$ 0.04    | 27.03 $\pm$ 0.11    | 38.52 $\pm$ 0.06    | 4.18 $\pm$ 0.05                         | 5.36 $\pm$ 0.06     | 7.43 $\pm$ 0.11     | 9.71 $\pm$ 0.04     |

Sup. Table S2. Energy and composition of some selected MOs of **C3-C6**.

| MO   | C3     |                  |       | C4 |        |                  | C5    |    |        | C6               |       |    |        |                  |       |     |
|------|--------|------------------|-------|----|--------|------------------|-------|----|--------|------------------|-------|----|--------|------------------|-------|-----|
|      | E (eV) | % of composition |       |    | E (eV) | % of composition |       |    | E (eV) | % of composition |       |    | E (eV) | % of composition |       |     |
|      |        | Pd               | Ambim | L   |
| L+3  | 0.01   | 50               | 31    | 19 | 0.14   | 12               | 82    | 6  | 0.01   | 47               | 22    | 31 | -0.17  | 2                | 1     | 97  |
| L+2  | -0.18  | 29               | 4     | 67 | 0.08   | 54               | 22    | 24 | -0.24  | 32               | 5     | 63 | -0.42  | 7                | 3     | 90  |
| L+1  | -1.06  | 2                | 98    | 0  | -1.01  | 1                | 98    | 0  | -1.07  | 1                | 98    | 0  | -1.14  | 1                | 98    | 1   |
| LUMO | -2.46  | 51               | 20    | 29 | -2.22  | 51               | 19    | 31 | -2.42  | 51               | 20    | 29 | -2.51  | 51               | 20    | 29  |
| HOMO | -5.98  | 20               | 8     | 73 | -5.73  | 18               | 4     | 78 | -5.94  | 19               | 6     | 75 | -5.92  | 1                | 0     | 99  |
| H-1  | -6.69  | 4                | 86    | 9  | -6.57  | 39               | 39    | 22 | -6.68  | 6                | 86    | 9  | -5.98  | 15               | 1     | 84  |
| H-2  | -6.76  | 5                | 93    | 2  | -6.62  | 28               | 45    | 27 | -6.77  | 7                | 91    | 2  | -6.13  | 0                | 0     | 100 |
| H-3  | -6.85  | 71               | 10    | 19 | -6.72  | 8                | 34    | 57 | -6.84  | 67               | 15    | 18 | -6.29  | 0                | 0     | 99  |

Sup. Table S3. Occupancy (e) and polarity (%) of natural bond orbitals (NBOs) and hybrids calculated<sup>(a)</sup> for **C4-C6**.

| System | NBO Orbital <sup>(b)</sup> | Occupancy | Polarity <sup>(c)</sup> | NBO Hybrid  | Atomic Orbitals <sup>(d)</sup> |
|--------|----------------------------|-----------|-------------------------|-------------|--------------------------------|
| C4     | $\sigma$ Pt-S              | 1.83058   | 22.47 (Pd)              | $sd^{2.05}$ | s(25.30%) p(22.77%) d(51.93%)  |
|        |                            |           | 77.33 (S)               | $sp^{7.08}$ | s(12.37%) p(87.63%)            |
|        | LP(O1)                     | 1.72674   | -                       | $sp^{4.19}$ | s(17.04%) p(71.40%)            |
|        | LP(N2)                     | 1.68079   | -                       | $sp^{4.25}$ | s(19.05%) p(80.95%)            |
| C5     | LP(N3)                     | 1.65421   | -                       | $sp^{6.21}$ | s(14.38%) p(89.30%)            |
|        | $\sigma$ Pt-S              | 1.96833   | 35.87 (Pd)              | $sd^{5.40}$ | s(14.15%) p(9.41%) d(76.45%)   |
|        |                            |           | 64.13 (S)               | $sp^{7.61}$ | s(11.62%) p(88.38%)            |
|        | LP(O1)                     | 1.67459   | -                       | $sp^{5.71}$ | s(14.90%) p(85.10%)            |
|        | LP(N2)                     | 1.67554   | -                       | $sp^{5.20}$ | s(16.12%) p(83.88%)            |
| C6     | LP(N3)                     | 1.65142   | -                       | $sp^{2.69}$ | s(27.13%) p(72.86%)            |
|        | $\sigma$ Pt-S              | 1.98535   | 22.09 (Pd)              | $sd^{8.40}$ | s(10.00%) p(5.95%) d(84.05%)   |
|        |                            |           | 77.91 (S)               | $sp^{3.71}$ | s(22.08%) p(77.78%)            |
|        | LP(O1)                     | 1.70257   | -                       | $sp^{5.54}$ | s(15.30%) p(84.70%)            |
|        | LP(N2)                     | 1.63588   | -                       | $sp^{8.27}$ | s(10.78%) p(89.16%)            |
|        | LP(N3)                     | 1.65142   | -                       | $sp^{6.01}$ | s(12.06%) p(72.48%)            |

(a) Calculations performed at B3LYP/ LANL2DZ /6-31G(d)/6-31G+(d) level of theory. (b) LP(N/O) is a valence lone pair orbital on nitrogen/oxygen atom. (c) Values for A–B sigma molecular orbital. (d) Percentage contribution of atomic orbitals in NBO hybrid.

Sup. Table S4. Selected vertical excitations calculated by TDDFT/B3LYP/6-31G(d)/6-31G+(d)/LANL2DZ /CPCM/water for **C3-C6**.

| Complex   | E <sub>ex</sub> (eV) | λ <sub>ex</sub> (nm) | λ <sub>max</sub> (expt.) (nm) | Osc. Strength (f) | Key transitions                                                          | Assignments                              |
|-----------|----------------------|----------------------|-------------------------------|-------------------|--------------------------------------------------------------------------|------------------------------------------|
| <b>C4</b> | 6.09                 | 203                  | 204                           | 0.2562            | H-14→LUMO (18%),<br>H-1→L+3 (18%),<br>H-13→LUMO (14%)                    | Ambim(π)/NALC(π)→Pd(dπ),<br>LMCT         |
|           | 5.25                 | 236                  | -                             | 0.2449            | HOMO→L+4 (36%),<br>HOMO→L+2 (21%),<br>H-11→LUMO (13%),<br>H-8→LUMO (11%) | Ambim(π)→Pd(dπ)/NALC(π*),<br>LMCT/LLCT   |
|           | 4.65                 | 267                  | 270<br>278                    | 0.2547            | H-8→LUMO (45%),<br>H-11→LUMO (15%)                                       | Ambim(π)→Pd(dπ)/NALC(π*),<br>LMCT/LLCT   |
|           | 3.92                 | 316                  | -                             | 0.0756            | H-3→LUMO (37%),<br>H-4→LUMO (25%),<br>H-2→LUMO (17%),<br>H-6→LUMO (12%)  | NALC(π)/Ambim(π)→Pd(dπ),<br>LMCT         |
| <b>C5</b> | 5.76                 | 215                  | 210                           | 0.1399            | H-5→LUMO (54%),<br>H-8→LUMO (17%)                                        | Ambim(π)/DL-pen(π)→Pd(dπ),<br>LMCT       |
|           | 5.00                 | 248                  | 244                           | 0.1881            | H-2→L+1 (53%),<br>H-3→L+1 (35%)                                          | Pd(dπ)/DL-pen(π)→Ambim(π*),<br>MLCT/LLCT |
|           | 4.50                 | 275                  | 272<br>278                    | 0.1436            | H-11→LUMO (45%),<br>H-12→LUMO (19%)                                      | DL-pen(π)→Pd(dπ)/Ambim(π*),<br>LMCT/LLCT |
| <b>C6</b> | 5.66                 | 219                  | 223                           | 0.1168            | H-7→L+2 (58%),<br>H-9→L+2 (30%)                                          | Ambim(π)/Pd(dπ) → GSH(π*)<br>LLCT/MLCT   |
|           | 5.03                 | 250                  | 272                           | 0.1747            | H-10→LUMO (73%)                                                          | GSH(π)/Pd(dπ)→Ambim(π*),<br>LLCT/MLCT    |
|           | 4.25                 | 291                  | 278                           | 0.1965            | H-8→L+1 (67%),<br>H-7→L+4 (15%)                                          | GSH(π)→Pd(dπ)/Ambim(π*),<br>LMCT/LLCT    |

Sup. Table S5. Band shift (nm) and free energy (kJ mol<sup>-1</sup>) of DNA binding by absorption titration.

| Complex   | Band shift | ΔG (kJ mol <sup>-1</sup> ) |
|-----------|------------|----------------------------|
| Δλ (nm)   |            |                            |
| <b>C1</b> | 7          | -27.18                     |
| <b>C2</b> | 4          | -26.99                     |
| <b>C3</b> | 6          | -26.37                     |
| <b>C4</b> | 7          | -26.22                     |
| <b>C5</b> | 6          | -26.07                     |
| <b>C6</b> | -2         | -25.22                     |

Sup. Table S6 A few hydrogen bonding interactions and the binding free energy of the most stable docking conformations for complexes **C1–C6** docked into DNA.

| Complex   | H-bonding               |                         |           | $\Delta G$ (kJ mol <sup>-1</sup> ) |
|-----------|-------------------------|-------------------------|-----------|------------------------------------|
|           | Donor (D–H)             | Acceptor (H···A)        | H···A (Å) |                                    |
| <b>C1</b> | N <sub>im</sub> (Ambim) | N (DC-13)               | 2.80      | -26.36                             |
|           | N <sub>im</sub> (Ambim) | N (DG-4)                | 3.43      |                                    |
|           | N <sub>im</sub> (Ambim) | O (DG-4)                | 3.16      |                                    |
| <b>C2</b> | N <sub>im</sub> (Ambim) | N (DG-4)                | 3.39      | -25.94                             |
|           | N <sub>im</sub> (Ambim) | O (DG-4)                | 3.11      |                                    |
|           | N <sub>am</sub> (Ambim) | N (DC-13)               | 3.29      |                                    |
| <b>C3</b> | N <sub>im</sub> (Ambim) | N (DG-4)                | 2.90      | -25.10                             |
|           | N <sub>im</sub> (Ambim) | N (DG-4)                | 3.29      |                                    |
| <b>C4</b> | N (DG-4)                | N <sub>im</sub> (Ambim) | 3.39      | -25.52                             |
|           | N (DG-4)                | N <sub>im</sub> (Ambim) | 3.49      |                                    |
| <b>C5</b> | N (DG-12)               | N <sub>im</sub> (Ambim) | 3.02      | -24.69                             |
|           | N (DG-12)               | N <sub>im</sub> (Ambim) | 3.06      |                                    |
| <b>C6</b> | O (GSH)                 | O (DA-19)               | 2.80      | -25.10                             |
|           | O (DT-8)                | O (GSH)                 | 3.49      |                                    |
|           | N (DT-8)                | N (GSH)                 | 2.92      |                                    |
|           | O (DT-18)               | N (GSH)                 | 3.28      |                                    |

Sup. Table S7. IC<sub>50</sub> values (in  $\mu\text{M}$ ) of the complexes **C1–C6** and cisplatin on different cancer cell lines for 48 hrs incubation.

| Complex          | IC <sub>50</sub> ( $\mu\text{M}$ ) |            |            |
|------------------|------------------------------------|------------|------------|
|                  | MDA-MB-231                         | A549       | HepG2      |
| <b>C1</b>        | 19.4 ± 0.5                         | 23.5 ± 0.8 | 25.2 ± 0.5 |
| <b>C2</b>        | 21.2 ± 0.6                         | 24.1 ± 1.0 | 30.1 ± 0.9 |
| <b>C3</b>        | 26.0 ± 0.9                         | 29.7 ± 0.7 | 33.2 ± 0.4 |
| <b>C4</b>        | 27.9 ± 1.2                         | 31.2 ± 0.6 | 31.7 ± 0.9 |
| <b>C5</b>        | 33.4 ± 0.7                         | 30.8 ± 0.4 | 38.0 ± 1.3 |
| <b>C6</b>        | 31.5 ± 0.6                         | 32.3 ± 0.9 | 35.4 ± 1.0 |
| <b>Cisplatin</b> | 37.1 ± 1.1                         | 19.0 ± 0.7 | 14.3 ± 0.8 |

ESI Equation S1. Wolfe-Shimer equation



The intrinsic binding constant ( $k_b$ ) for all the studied complexes has been evaluated by using Wolfe-Shimer equation [1].

$$[\text{DNA}] / [\epsilon_a - \epsilon_f] = [\text{DNA}] / [\epsilon_b - \epsilon_f] + 1 / \{K_b \times [\epsilon_b - \epsilon_f]\}$$

Where, [DNA] is the concentration of CT-DNA in base pairs,  $\epsilon_a$ ,  $\epsilon_f$ ,  $\epsilon_b$  correspond to the extinction coefficient of observed ( $A_{\text{obsd}}/[\text{M}]$ ), free complex and of the complex when fully bound to CT-DNA respectively. [DNA]/( $\epsilon_a - \epsilon_f$ ) versus [DNA] has been plotted and the slope to intercept ratio gives the magnitude of  $K_b$  for each of the complexes.

#### ESI Equation S2. Free energy of binding

ESI Equation 2 has been used to calculate the free energy ( $\Delta G$ ) of binding for complex-DNA adduct formation [2].

$$\Delta G = -RT \ln K_b$$

#### ESI Equation S3. Stern–Volmer equation

$$I_0/I = 1 + K_{sv}[Q] = 1 + k_q\tau_0$$

$I_0$  and  $I$  are the fluorescence intensities at 587 nm in absence and presence of the quencher 'Q' [Pd(II) complexes] respectively.  $K_{sv}$ , the linear Stern-Volmer quenching constant [3] was determined by linear regression of a plot of  $I_0/I$  vs [Q].  $k_q$  is the bimolecular quenching constant and  $\tau_0$  is the lifetime of the chromophore in the absence of the quencher ( $\tau_0 = 23 \times 10^{-9}$  s for EB-bound DNA).[4]

#### ESI Equation S4. Scatchard equation

$$\log (I_0 - I)/I = \log K_F + n \log [Q]$$

$\log (I_0 - I)/I$  versus  $\log [Q]$  has been plotted and fitted linearly. Intercept will provide the binding constant  $K_F$ . The number of binding sites per nucleotide i.e., 'n' has been obtained from the slope [5].

## References

- [1] A. Wolfe, G.H. Shimer and T. Meehan, *Biochem.*, 1987, **26**, 6392.
- [2] K. Karami, Z. M. Lighvan, S. A. Barzani, A. Y. Faal, M. Poshteh-Shirani, T. Khayamian, V. Eignerc and M. Dus̆ek, *New J. Chem.*, 2015, **39**, 8708.
- [3] H. Akbaş, A. Karadağ, A. Aydın, A. Destegül and Z. Kılıç, *J. Mol. Liq.*, 2017, **230**, 482.
- [4] D. P. Heller and C. L. Greenstock, *Biophys. Chem.*, 1994, **50**, 305.
- [5] J. Min, X. M. Meng-Xia, Z. Dong, L. Yuan, L. Xiao-Yu and C. Xing, *J. Mol. Struct.*, 2004, **692**, 71.
